# Supplementary material for: Construction of a series of pH stable Ca-based MOFs, their CO2 adsorption and catalytic activity
Source: Royal Society of Chemistry journal article supplement (doi:10.1039/d4dt01150c), 2024-01-01
Supplement: d4dt01150c1.pdf [file d4dt01150c1.pdf]

## Supporting Information

### **Construction of a series of pH stable Ca-based MOFs, their CO<sub>2</sub> adsorption and catalytic activity**

*Sudip Bhattacharjee<sup>a</sup>, Tonmoy Chakrobarty<sup>a</sup>, Soumadip Banerjee<sup>b</sup>, Abhijit K. Das<sup>b</sup> and Asim Bhaumik<sup>a\*</sup>*

<sup>a</sup>School of Materials Sciences, Indian Association for the Cultivation of Science, 2A & 2B Raja S. C. Mullick Road, Jadavpur, Kolkata 700032, India, Email: msab@iacs.res.in

<sup>b</sup>School of Mathematical & Computational Sciences, Indian Association for the Cultivation of Science, Jadavpur, Kolkata 700032, India

| <b>Entry</b>   | <b>Contents</b>                                                                                                                  | <b>Page</b> |
|----------------|----------------------------------------------------------------------------------------------------------------------------------|-------------|
| Scheme S1      | Optimization synthesis strategy                                                                                                  |             |
| Figure S1      | Different bridging coordination modes of the carboxylate groups of each ligand in Ca-MOF 1-4.                                    | 4           |
| Figure S2.     | (a) Coordination environment of Ca(II), (b) different coordination mode of the carboxylate groups of PDA ligand in Ca-MOF 1.     | 4           |
| Figure S3.     | (a) Coordination environment of Ca(II), (b) different coordination mode of the carboxylate groups of 1,4 NDC ligand in Ca-MOF 2. | 5           |
| Figure S4.     | Different coordination modes of the carboxylate groups of each ligand in Ca-MOF 3-4.                                             | 5           |
| Table S1.      | Crystal and Structure Refinement Data for Ca-MOF (1-4).                                                                          | 6-7         |
| Table S2.      | Bond Lengths (Å) for Ca-MOF 1.                                                                                                   | 7           |
| Table S3.      | Bond Angles (°) for Ca-MOF 1.                                                                                                    | 7           |
| Table S4.      | Bond Lengths (Å) for Ca-MOF 2.                                                                                                   | 8           |
| Table S5.      | Bond Angles (°) for Ca-MOF 2.                                                                                                    | 9           |
| Table S6.      | Bond Lengths (Å) for Ca-MOF 3.                                                                                                   | 10          |
| Table S7.      | Bond Angles (°) for Ca-MOF 3.                                                                                                    | 10-11       |
| Table S8.      | Bond Lengths (Å) for Ca-MOF 4.                                                                                                   | 12          |
| Table S9.      | Bond Angles (°) for Ca-MOF 4.                                                                                                    | 13          |
| Table S10.     | Hydrogen bonds for Ca-MOF-4 (Å) and (°).                                                                                         | 14          |
| Figure S5.     | PXRD pattern of Ca-MOF-1 (a), Ca-MOF-2 (b), Ca-MOF-3 (c) and Ca-MOF-4 (d) in methanol.                                           | 15          |
| Figure S6.     | PXRD pattern of Ca-MOF-1 (a), Ca-MOF-2 (b), Ca-MOF-3 (c) and Ca-MOF-4 (d) at different pH medium.                                | 16          |
| Figure S7.     | FT-IR of Ca-MOF-1 (a), Ca-MOF-2 (b), Ca-MOF-3 (c) and Ca-MOF-4 (d).                                                              | 17          |
| Figure S8.     | Elemental mapping of Ca-MOFs.                                                                                                    | 18          |
| Figure S9.     | TGA and DTG plot of Ca-MOF-1 (a), Ca-MOF-2 (b), Ca-MOF-3 (c) and Ca-MOF-4 (d).                                                   | 19          |
| Table S11.     | AIM analysis of EM-2 concerning the epoxide binding with the metal center at B3LYP/6-31G (d,p) level.                            | 20-21       |
| Figure S10-16. | Chromatographic data of the reaction products.                                                                                   | 22-25       |
| Figure S10.    | Recyclability of Ca-MOFs.                                                                                                        | 26          |
| Figure S11.    | TEM images of the Ca-MOFs after catalysis.                                                                                       | 26          |
| Figure S19.    | DFT optimized structures of the model Ca-MOFs (a) and corresponding epoxide bonded complexes (b).                                | 27          |

|              |                         |       |
|--------------|-------------------------|-------|
| Co-ordinates | Cartesian Co-ordinates. | 28-44 |
| References   | References.             | 45    |

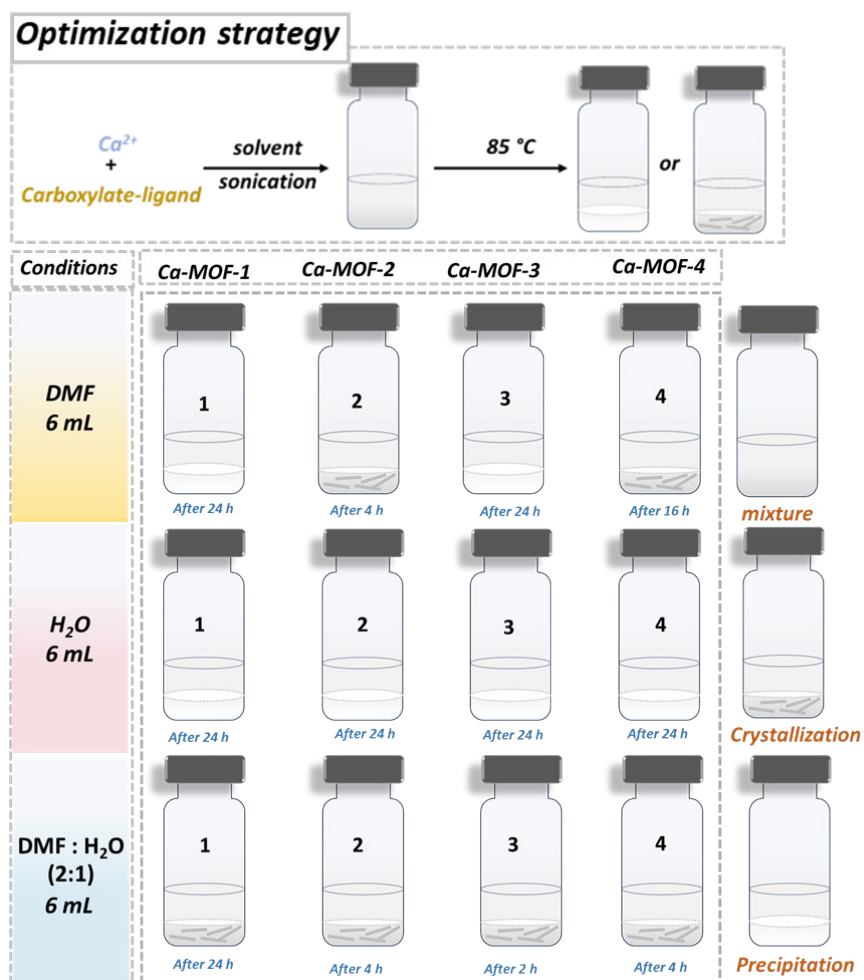

**Scheme S1.** Optimization synthesis strategy for the crystallization of four Ca-based MOFs. Reaction conditions: metal: ligand = 2:1, solvent 6 ml (DMF: H<sub>2</sub>O = 2:1).

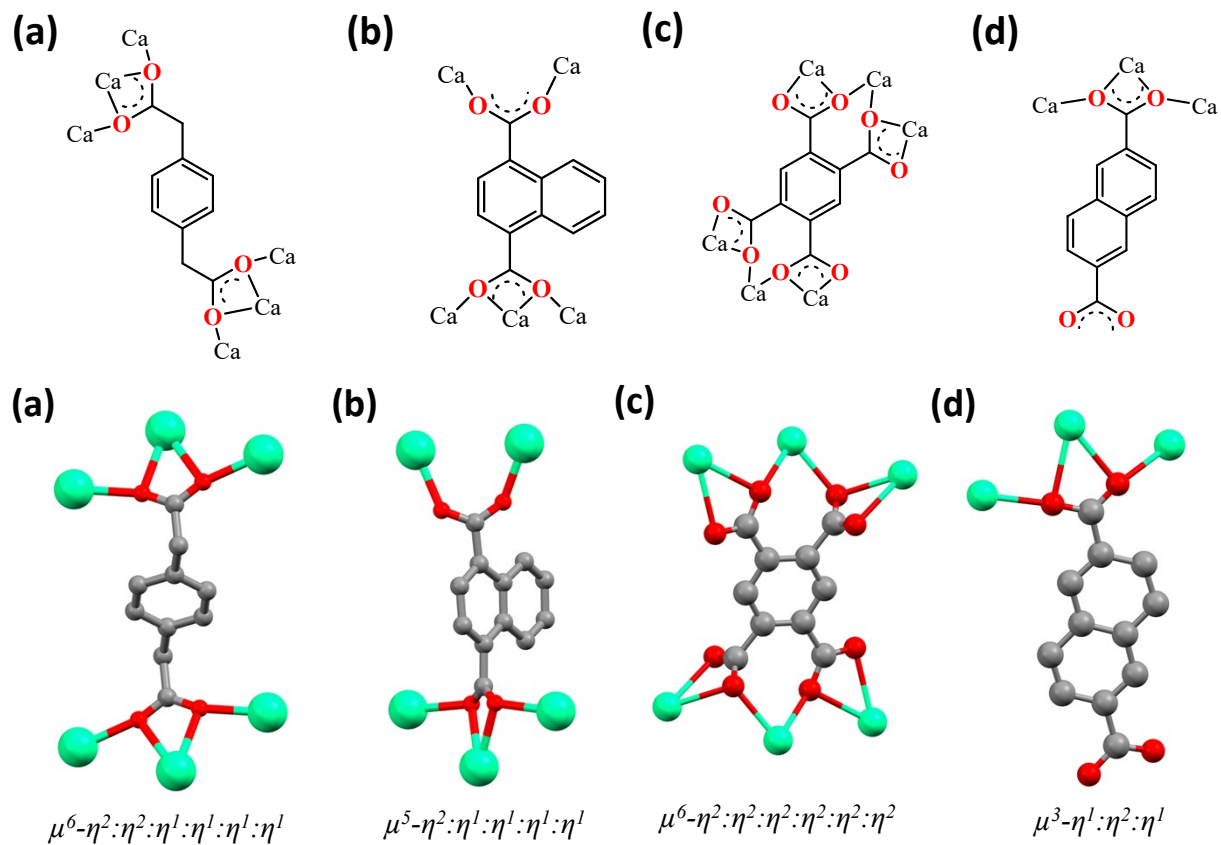

**Figure S1.** Different bridging coordination modes of the carboxylate groups of each ligand in Ca-MOF 1-4.

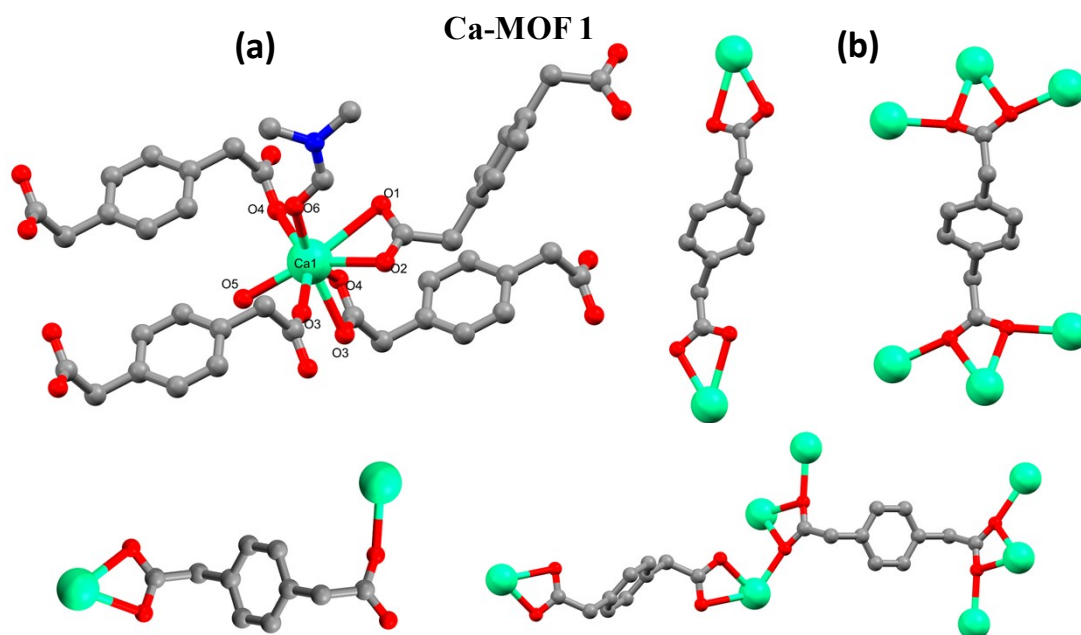

**Figure S2.** (a) Coordination environment of Ca(II), (b) different coordination mode of the carboxylate groups of PDA ligand in **Ca-MOF 1**.

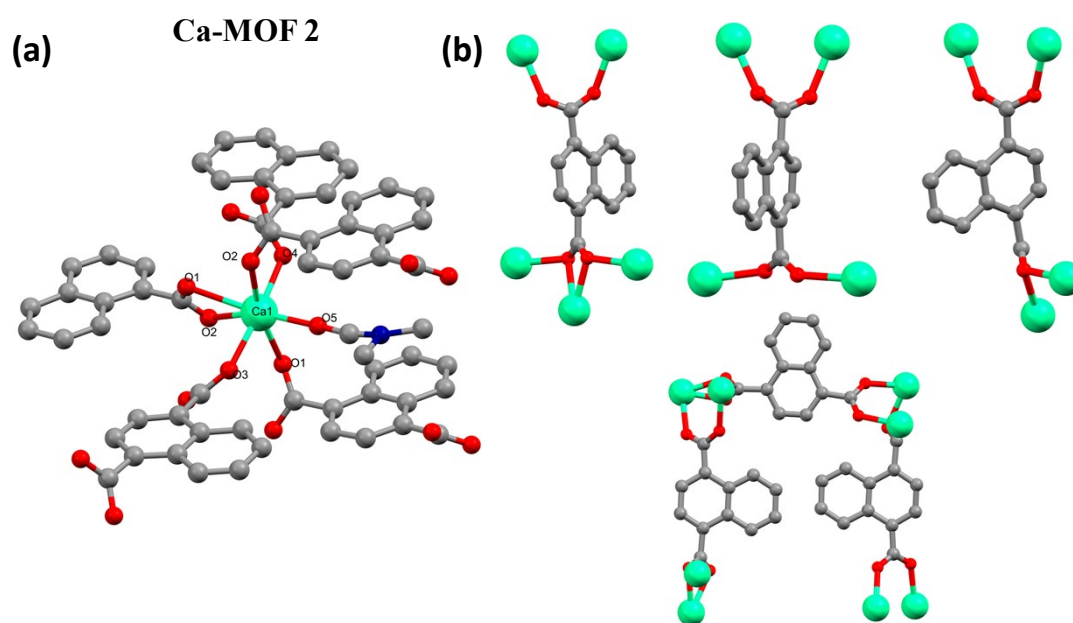

**Figure S3.** (a) Coordination environment of Ca(II), (b) different coordination mode of the carboxylate groups of 1,4 NDC ligand in **Ca-MOF 2**.

### Ca-MOF 3

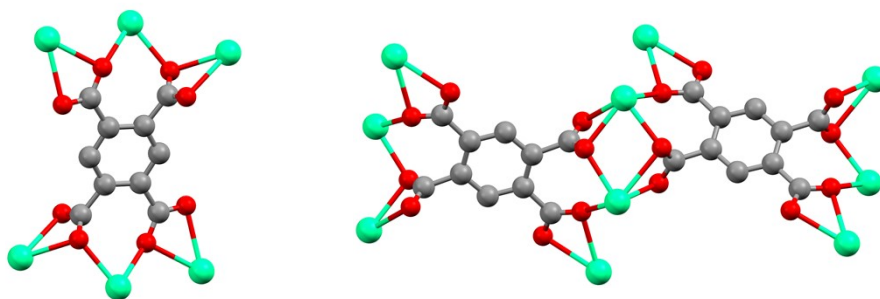

### Ca-MOF 4

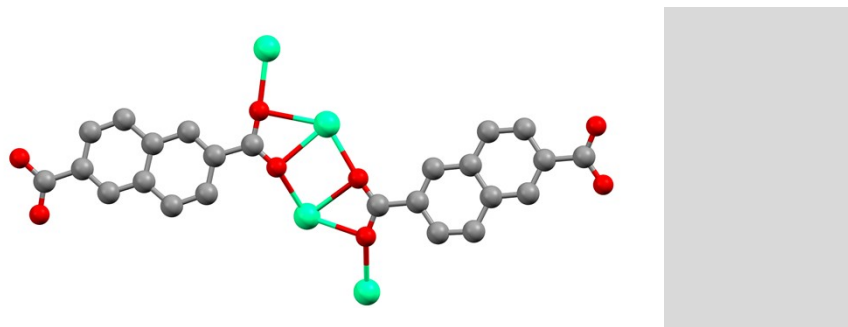

**Figure S4.** Different coordination modes of the carboxylate groups of each ligand in **Ca-MOF 3-4**.

**Table S1.** Crystal and Structure Refinement Data for **Ca-MOF (1-4)**.

| CCDC No.          | 2234284              | 2234285                           | 2284521                         | 2284522                  |
|-------------------|----------------------|-----------------------------------|---------------------------------|--------------------------|
| empirical formula | $C_{13}H_{17}CaNO_6$ | $C_{15.01}H_{13.13}CaN_{0.98}O_5$ | $C_{13.05}H_{15.05}Ca_2NO_{12}$ | $C_{24}H_{24}Ca_2O_{14}$ |
| formula weight    | 323.35               | 327.32                            | 458.07                          | 616.59                   |
| temperature/K     | 145.0                | 144.95                            | 166.52                          | 145.26                   |
| crystal system    | triclinic            | orthorhombic                      | triclinic                       | triclinic                |
| space group       | P-1                  | $P2_12_12_1$                      | P-1                             | P1                       |
| a/Å               | 6.7506(13)           | 6.6525(13)                        | 9.2135(19)                      | 6.527(18)                |
| b/Å               | 10.564(2)            | 14.409(3)                         | 10.112(2)                       | 7.215(18)                |
| c/Å               | 10.746(2)            | 14.878(4)                         | 10.455(2)                       | 13.83(5)                 |
| $\alpha/^\circ$   | 77.010(7)            | 90                                | 96.156(8)                       | 74.90(13)                |
| $\beta/^\circ$    | 82.594(6)            | 90                                | 98.994(7)                       | 76.50(8)                 |

|                                                |                                                               |                                                               |                                                               |                                                               |
|------------------------------------------------|---------------------------------------------------------------|---------------------------------------------------------------|---------------------------------------------------------------|---------------------------------------------------------------|
| $\gamma/^\circ$                                | 81.892(6)                                                     | 90                                                            | 113.548(7)                                                    | 89.9(2)                                                       |
| volume/ $\text{\AA}^3$                         | 735.5(2)                                                      | 1426.2(5)                                                     | 866.3(3)                                                      | 610(3)                                                        |
| Z                                              | 2                                                             | 4                                                             | 2                                                             | 1                                                             |
| $\rho_{\text{calc}}(\text{g}/\text{cm}^3)$     | 1.460                                                         | 1.524                                                         | 1.756                                                         | 1.678                                                         |
| $\mu/\text{mm}^{-1}$                           | 0.453                                                         | 0.463                                                         | 0.727                                                         | 0.545                                                         |
| F(000)                                         | 340.0                                                         | 680.0                                                         | 473.0                                                         | 320.0                                                         |
| crystal size/ $\text{mm}^3$                    | $0.4 \times 0.3 \times 0.2$                                   |
| radiation                                      | MoK $\alpha$<br>( $\lambda = 0.71073$ )                       |
| 2 $\theta$ range for data collection/ $^\circ$ | 4.96 to 49.996                                                | 5.654 to 50                                                   | 4.474 to 49.998                                               | 5.86 to 68.93                                                 |
| index ranges                                   | $-8 \leq h \leq 8, -12 \leq k \leq 12, -12 \leq l \leq 12$    | $-7 \leq h \leq 7, -14 \leq k \leq 17, -17 \leq l \leq 17$    | $-9 \leq h \leq 10, -12 \leq k \leq 12, -12 \leq l \leq 12$   | $-9 \leq h \leq 10, -10 \leq k \leq 11, -21 \leq l \leq 21$   |
| reflections collected                          | 5555                                                          | 13214                                                         | 7790                                                          | 8117                                                          |
| independent reflections                        | 2550 [ $R_{\text{int}} = 0.0456, R_{\text{sigma}} = 0.0665$ ] | 2492 [ $R_{\text{int}} = 0.0660, R_{\text{sigma}} = 0.0444$ ] | 2971 [ $R_{\text{int}} = 0.0525, R_{\text{sigma}} = 0.0593$ ] | 6080 [ $R_{\text{int}} = 0.0800, R_{\text{sigma}} = 0.2056$ ] |
| data/restraints/parameters                     | 2550/0/193                                                    | 2492/0/235                                                    | 2971/1/272                                                    | 6080/5/310                                                    |
| goodness-of-fit on $F^2$                       | 1.063                                                         | 1.044                                                         | 1.033                                                         | 1.056                                                         |
| final R indexes [ $I \geq 2\sigma(I)$ ]        | $R_1 = 0.0538, wR_2 = 0.1273$                                 | $R_1 = 0.0313, wR_2 = 0.0687$                                 | $R_1 = 0.0398, wR_2 = 0.1055$                                 | $R_1 = 0.0868, wR_2 = 0.1585$                                 |
| final R indexes [all data]                     | $R_1 = 0.0755, wR_2 = 0.1385$                                 | $R_1 = 0.0395, wR_2 = 0.0735$                                 | $R_1 = 0.0423, wR_2 = 0.1076$                                 | $R_1 = 0.1659, wR_2 = 0.1986$                                 |
| largest diff. peak/hole/ $e.\text{\AA}^{-3}$   | 0.76/-0.34                                                    | 0.20/-0.31                                                    | 0.58/-1.41                                                    | 0.92/-1.43                                                    |

**Table S2.** Bond Lengths (Å) for **Ca-MOF 1**.

| Atom | Atom             | Length/Å   | Atom | Atom             | Length/Å |
|------|------------------|------------|------|------------------|----------|
| Ca1  | Ca1 <sup>1</sup> | 3.9003(14) | Ca1  | O2               | 2.432(2) |
| Ca1  | Ca1 <sup>2</sup> | 3.9651(13) | Ca1  | O1               | 2.800(3) |
| Ca1  | O4 <sup>2</sup>  | 2.492(2)   | Ca1  | O5               | 2.378(2) |
| Ca1  | O4 <sup>3</sup>  | 2.370(2)   | Ca1  | O6               | 2.407(2) |
| Ca1  | O3               | 2.364(2)   | Ca1  | C10 <sup>2</sup> | 2.906(3) |
| Ca1  | O3 <sup>2</sup>  | 2.594(2)   |      |                  |          |

Symmetry transformations used to generate equivalent atoms: <sup>1</sup>2-X,1-Y,1-Z; <sup>2</sup>1-X,1-Y,1-Z; <sup>3</sup>1+X,+Y,+Z.

**Table S3.** Bond Angles (°) for **Ca-MOF 1**.

| Atom             | Atom | Atom             | Angle/°   | Atom             | Atom | Atom             | Angle/°   |
|------------------|------|------------------|-----------|------------------|------|------------------|-----------|
| Ca1 <sup>1</sup> | Ca1  | Ca1 <sup>2</sup> | 118.24(3) | Ca1 <sup>1</sup> | Ca1  | Ca1 <sup>2</sup> | 118.24(3) |
| O4 <sup>3</sup>  | Ca1  | Ca1 <sup>1</sup> | 37.74(5)  | O4 <sup>3</sup>  | Ca1  | Ca1 <sup>1</sup> | 37.74(5)  |
| O4 <sup>2</sup>  | Ca1  | Ca1 <sup>1</sup> | 35.60(5)  | O4 <sup>2</sup>  | Ca1  | Ca1 <sup>1</sup> | 35.60(5)  |
| O4 <sup>2</sup>  | Ca1  | Ca1 <sup>2</sup> | 86.05(5)  | O4 <sup>2</sup>  | Ca1  | Ca1 <sup>2</sup> | 86.05(5)  |
| O4 <sup>3</sup>  | Ca1  | Ca1 <sup>2</sup> | 148.35(6) | O4 <sup>3</sup>  | Ca1  | Ca1 <sup>2</sup> | 148.35(6) |
| O4 <sup>3</sup>  | Ca1  | O4 <sup>2</sup>  | 73.34(8)  | O4 <sup>3</sup>  | Ca1  | O4 <sup>2</sup>  | 73.34(8)  |
| O4 <sup>2</sup>  | Ca1  | O3 <sup>2</sup>  | 51.27(7)  | O4 <sup>2</sup>  | Ca1  | O3 <sup>2</sup>  | 51.27(7)  |
| O4 <sup>3</sup>  | Ca1  | O3 <sup>2</sup>  | 121.38(7) | O4 <sup>3</sup>  | Ca1  | O3 <sup>2</sup>  | 121.38(7) |
| O4 <sup>3</sup>  | Ca1  | O2               | 128.29(8) | O4 <sup>3</sup>  | Ca1  | O2               | 128.29(8) |
| O4 <sup>3</sup>  | Ca1  | O1               | 79.27(7)  | O4 <sup>3</sup>  | Ca1  | O1               | 79.27(7)  |
| O4 <sup>2</sup>  | Ca1  | O1               | 72.84(7)  | O4 <sup>2</sup>  | Ca1  | O1               | 72.84(7)  |
| O4 <sup>3</sup>  | Ca1  | O5               | 78.83(8)  | O4 <sup>3</sup>  | Ca1  | O5               | 78.83(8)  |
| O4 <sup>3</sup>  | Ca1  | O6               | 84.14(8)  | O4 <sup>3</sup>  | Ca1  | O6               | 84.14(8)  |
| O4 <sup>3</sup>  | Ca1  | C10 <sup>2</sup> | 98.17(8)  | O4 <sup>3</sup>  | Ca1  | C10 <sup>2</sup> | 98.17(8)  |
| O4 <sup>2</sup>  | Ca1  | C10 <sup>2</sup> | 25.74(7)  | O4 <sup>2</sup>  | Ca1  | C10 <sup>2</sup> | 25.74(7)  |
| O3 <sup>2</sup>  | Ca1  | Ca1 <sup>2</sup> | 34.95(5)  | O3 <sup>2</sup>  | Ca1  | Ca1 <sup>2</sup> | 34.95(5)  |
| O3 <sup>2</sup>  | Ca1  | Ca1 <sup>1</sup> | 85.22(5)  | O3 <sup>2</sup>  | Ca1  | Ca1 <sup>1</sup> | 85.22(5)  |
| O3               | Ca1  | Ca1 <sup>2</sup> | 38.94(5)  | O3               | Ca1  | Ca1 <sup>2</sup> | 38.94(5)  |
| O3               | Ca1  | Ca1 <sup>1</sup> | 152.25(6) | O3               | Ca1  | Ca1 <sup>1</sup> | 152.25(6) |
| O3               | Ca1  | O4 <sup>3</sup>  | 148.90(9) | O3               | Ca1  | O1               | 127.93(8) |
| O3               | Ca1  | O4 <sup>2</sup>  | 124.81(7) | O3               | Ca1  | O5               | 76.83(8)  |
| O3               | Ca1  | O3 <sup>2</sup>  | 73.89(8)  | O3               | Ca1  | O6               | 85.93(8)  |



| Atom            | Atom | Atom             | Angle/°   | Atom            | Atom | Atom             | Angle/°   |
|-----------------|------|------------------|-----------|-----------------|------|------------------|-----------|
| O3              | Ca1  | O2               | 80.25(8)  | O3 <sup>2</sup> | Ca1  | C10 <sup>2</sup> | 25.67(7)  |
| O3 <sup>2</sup> | Ca1  | O1               | 98.74(7)  | O3              | Ca1  | C10 <sup>2</sup> | 99.56(8)  |
| O2              | Ca1  | Ca1 <sup>1</sup> | 111.90(6) | O2              | Ca1  | Ca1 <sup>2</sup> | 73.90(6)  |
| O2              | Ca1  | O4 <sup>2</sup>  | 89.68(8)  | O1              | Ca1  | Ca1 <sup>1</sup> | 72.45(5)  |
| O2              | Ca1  | O3 <sup>2</sup>  | 74.35(8)  | O1              | Ca1  | Ca1 <sup>2</sup> | 117.77(6) |
| O2              | Ca1  | O1               | 49.02(7)  | O1              | Ca1  | C10 <sup>2</sup> | 83.73(8)  |
| O2              | Ca1  | C10 <sup>2</sup> | 79.27(8)  | O5              | Ca1  | Ca1 <sup>2</sup> | 76.94(6)  |
| O5              | Ca1  | Ca1 <sup>1</sup> | 82.45(6)  | O5              | Ca1  | O2               | 150.83(8) |
| O5              | Ca1  | O4 <sup>2</sup>  | 88.77(8)  | O5              | Ca1  | O1               | 154.68(8) |
| O5              | Ca1  | O3 <sup>2</sup>  | 82.08(8)  | O5              | Ca1  | O6               | 109.33(8) |

Symmetry transformations used to generate equivalent atoms: <sup>1</sup>2-X,1-Y,1-Z; <sup>2</sup>1-X,1-Y,1-Z; <sup>3</sup>1+X,+Y,+Z.

**Table S4.** Bond Lengths (Å) for **Ca-MOF 2**.

| Atom | Atom             | Length/Å  | Atom | Atom            | Length/Å |
|------|------------------|-----------|------|-----------------|----------|
| Ca1  | Ca1 <sup>1</sup> | 3.8839(9) | Ca1  | O4              | 2.332(2) |
| Ca1  | Ca1 <sup>2</sup> | 3.8839(9) | Ca1  | O3 <sup>2</sup> | 2.315(2) |
| Ca1  | O2 <sup>3</sup>  | 2.487(2)  | Ca1  | O5              | 2.280(3) |
| Ca1  | O2 <sup>4</sup>  | 2.435(2)  | Ca1  | C1 <sup>3</sup> | 2.867(3) |
| Ca1  | O1 <sup>5</sup>  | 2.456(2)  | Ca1  | O1 <sup>3</sup> | 2.544(2) |

Symmetry transformations used to generate equivalent atoms: <sup>1</sup>1/2+X,3/2-Y,1-Z; <sup>2</sup>-1/2+X,3/2-Y,1-Z; <sup>3</sup>1-X,1/2+Y,1/2-Z; <sup>4</sup>3/2-X,1-Y,1/2+Z; <sup>5</sup>1/2-X,1-Y,1/2+Z.

**Table S5.** Bond Angles (°) for **Ca-MOF 2**.

| Atom             | Atom | Atom             | Angle/°   | Atom            | Atom | Atom             | Angle/°   |
|------------------|------|------------------|-----------|-----------------|------|------------------|-----------|
| Ca1 <sup>1</sup> | Ca1  | Ca1 <sup>2</sup> | 117.83(3) | O1 <sup>5</sup> | Ca1  | O1 <sup>3</sup>  | 121.41(7) |
| O2 <sup>3</sup>  | Ca1  | Ca1 <sup>2</sup> | 37.43(5)  | O1 <sup>3</sup> | Ca1  | C1 <sup>3</sup>  | 26.16(8)  |
| O2 <sup>4</sup>  | Ca1  | Ca1 <sup>1</sup> | 38.37(5)  | O1 <sup>5</sup> | Ca1  | C1 <sup>3</sup>  | 96.57(9)  |
| O2 <sup>4</sup>  | Ca1  | Ca1 <sup>2</sup> | 152.11(6) | O4              | Ca1  | Ca1 <sup>1</sup> | 70.26(7)  |
| Ca1 <sup>6</sup> | O2   | Ca1 <sup>7</sup> | 104.20(8) | O4              | Ca1  | Ca1 <sup>2</sup> | 107.14(7) |
| C1               | O2   | Ca1 <sup>6</sup> | 134.7(2)  | O4              | Ca1  | O2 <sup>4</sup>  | 80.56(9)  |
| C1               | O2   | Ca1 <sup>7</sup> | 94.05(19) | O4              | Ca1  | O2 <sup>3</sup>  | 85.23(9)  |
| Ca1 <sup>8</sup> | O1   | Ca1 <sup>7</sup> | 101.90(8) | O4              | Ca1  | O1 <sup>5</sup>  | 97.55(9)  |
| O2 <sup>3</sup>  | Ca1  | Ca1 <sup>1</sup> | 82.18(6)  | O4              | Ca1  | O1 <sup>3</sup>  | 92.52(8)  |
| O2 <sup>4</sup>  | Ca1  | O2 <sup>3</sup>  | 120.19(7) | O4              | Ca1  | C1 <sup>3</sup>  | 88.03(9)  |

| Atom            | Atom | Atom             | Angle/°   | Atom            | Atom | Atom             | Angle/°    |
|-----------------|------|------------------|-----------|-----------------|------|------------------|------------|
| O2 <sup>4</sup> | Ca1  | O1 <sup>3</sup>  | 70.71(7)  | O3 <sup>2</sup> | Ca1  | Ca1 <sup>2</sup> | 65.06(6)   |
| O2 <sup>3</sup> | Ca1  | O1 <sup>3</sup>  | 52.19(7)  | O3 <sup>2</sup> | Ca1  | Ca1 <sup>1</sup> | 109.25(7)  |
| O2 <sup>4</sup> | Ca1  | O1 <sup>5</sup>  | 167.87(8) | O3 <sup>2</sup> | Ca1  | O2 <sup>3</sup>  | 86.09(8)   |
| O2 <sup>4</sup> | Ca1  | C1 <sup>3</sup>  | 95.34(9)  | O3 <sup>2</sup> | Ca1  | O2 <sup>4</sup>  | 104.55(9)  |
| O2 <sup>3</sup> | Ca1  | C1 <sup>3</sup>  | 26.04(9)  | O3 <sup>2</sup> | Ca1  | O1 <sup>3</sup>  | 82.73(9)   |
| O1 <sup>3</sup> | Ca1  | Ca1 <sup>2</sup> | 82.04(6)  | O3 <sup>2</sup> | Ca1  | O1 <sup>5</sup>  | 78.91(8)   |
| O1 <sup>5</sup> | Ca1  | Ca1 <sup>2</sup> | 39.87(5)  | O3 <sup>2</sup> | Ca1  | O4               | 171.29(9)  |
| O1 <sup>5</sup> | Ca1  | Ca1 <sup>1</sup> | 151.85(6) | O3 <sup>2</sup> | Ca1  | C1 <sup>3</sup>  | 84.50(9)   |
| O1 <sup>3</sup> | Ca1  | Ca1 <sup>1</sup> | 38.23(5)  | O5              | Ca1  | Ca1 <sup>2</sup> | 121.36(8)  |
| O1 <sup>5</sup> | Ca1  | O2 <sup>3</sup>  | 71.34(7)  | O5              | Ca1  | Ca1 <sup>1</sup> | 120.59(8)  |
| C1              | O1   | Ca1 <sup>8</sup> | 131.8(2)  | O5              | Ca1  | O2 <sup>3</sup>  | 156.46(10) |
| C1              | O1   | Ca1 <sup>7</sup> | 91.32(18) | O5              | Ca1  | O2 <sup>4</sup>  | 83.14(9)   |
| C12             | O4   | Ca1              | 129.8(2)  | O5              | Ca1  | O1 <sup>3</sup>  | 150.49(10) |
| C12             | O3   | Ca1 <sup>1</sup> | 138.2(2)  | O5              | Ca1  | O1 <sup>5</sup>  | 85.18(10)  |
| C13A            | O5   | Ca1              | 141.1(6)  | O5              | Ca1  | O4               | 96.52(10)  |
| C13B            | O5   | Ca1              | 178.5(5)  | O5              | Ca1  | O3 <sup>2</sup>  | 91.14(11)  |
| O2              | C1   | Ca1 <sup>7</sup> | 59.91(16) | O5              | Ca1  | C1 <sup>3</sup>  | 174.88(11) |
| O1              | C1   | Ca1 <sup>7</sup> | 62.51(16) | C1 <sup>3</sup> | Ca1  | Ca1 <sup>2</sup> | 59.02(8)   |
| C2              | C1   | Ca1 <sup>7</sup> | 175.4(2)  | C1 <sup>3</sup> | Ca1  | Ca1 <sup>1</sup> | 58.82(8)   |
| O5              | Ca1  | Ca1 <sup>1</sup> | 82.45(6)  | O5              | Ca1  | O2               | 150.83(8)  |
| O5              | Ca1  | O4 <sup>2</sup>  | 88.77(8)  | O5              | Ca1  | O1               | 154.68(8)  |
| O5              | Ca1  | O3 <sup>2</sup>  | 82.08(8)  | O5              | Ca1  | O6               | 109.33(8)  |

Symmetry transformations used to generate equivalent atoms: <sup>1</sup>1/2+X,3/2-Y,1-Z; <sup>2</sup>-1/2+X,3/2-Y,1-Z; <sup>3</sup>1-X,1/2+Y,1/2-Z; <sup>4</sup>3/2-X,1-Y,1/2+Z; <sup>5</sup>1/2-X,1-Y,1/2+Z; <sup>6</sup>3/2-X,1-Y,-1/2+Z; <sup>7</sup>1-X,-1/2+Y,1/2-Z; <sup>8</sup>1/2-X,1-Y,-1/2+Z.

**Table S6.** Bond Lengths (Å) for **Ca-MOF 3**.

| Atom | Atom             | Length/Å   | Atom | Atom            | Length/Å |
|------|------------------|------------|------|-----------------|----------|
| Ca2  | Ca2 <sup>1</sup> | 3.8924(13) | Ca2  | O7 <sup>1</sup> | 2.473(2) |
| Ca2  | Ca1              | 3.9490(11) | Ca2  | O7              | 2.387(2) |
| Ca2  | O8 <sup>1</sup>  | 2.492(2)   | Ca2  | O3              | 2.602(2) |
| Ca2  | O4               | 2.437(2)   | Ca2  | O9              | 2.399(2) |

| Atom | Atom             | Length/Å   | Atom | Atom            | Length/Å |
|------|------------------|------------|------|-----------------|----------|
| Ca2  | O6               | 2.381(2)   | Ca2  | O10             | 2.401(2) |
| Ca2  | C10 <sup>1</sup> | 2.828(3)   | Ca1  | O1 <sup>3</sup> | 2.577(2) |
| Ca1  | Ca1 <sup>2</sup> | 3.9323(13) | Ca1  | O5              | 2.450(2) |
| Ca1  | O4               | 2.381(2)   | Ca1  | O11             | 2.409(2) |
| Ca1  | O2 <sup>3</sup>  | 2.521(2)   | Ca1  | O12             | 2.314(2) |
| Ca1  | O2 <sup>4</sup>  | 2.434(2)   | Ca1  | C1 <sup>3</sup> | 2.894(3) |
| Ca1  | O6               | 2.655(2)   |      |                 |          |

Symmetry transformations used to generate equivalent atoms: <sup>1</sup>2-X,1-Y,1-Z; <sup>2</sup>1-X,-Y,-Z; <sup>3</sup>+X,-1+Y,+Z; <sup>4</sup>1-X,1-Y,-Z; <sup>5</sup>2-X,-Y,1-Z.

**Table S7.** Bond Angles (°) for **Ca-MOF 3**.

| Atom             | Atom | Atom             | Angle/°   | Atom            | Atom | Atom             | Angle/°   |
|------------------|------|------------------|-----------|-----------------|------|------------------|-----------|
| Ca2 <sup>1</sup> | Ca2  | Ca1              | 130.68(2) | O1 <sup>3</sup> | Ca1  | O6               | 83.49(7)  |
| O8 <sup>1</sup>  | Ca2  | Ca2 <sup>1</sup> | 87.14(5)  | O1 <sup>3</sup> | Ca1  | C1 <sup>3</sup>  | 25.94(7)  |
| O8 <sup>1</sup>  | Ca2  | Ca1              | 116.24(5) | O5              | Ca1  | Ca2              | 68.19(6)  |
| O8 <sup>1</sup>  | Ca2  | O3               | 73.15(7)  | O5              | Ca1  | Ca1 <sup>2</sup> | 78.51(5)  |
| O8 <sup>1</sup>  | Ca2  | C10 <sup>1</sup> | 26.49(7)  | O5              | Ca1  | O2 <sup>3</sup>  | 82.02(7)  |
| O4               | Ca2  | Ca2 <sup>1</sup> | 128.56(5) | O5              | Ca1  | O6               | 51.35(7)  |
| O4               | Ca2  | Ca1              | 34.49(5)  | O5              | Ca1  | O1 <sup>3</sup>  | 76.97(8)  |
| O4               | Ca2  | O8 <sup>1</sup>  | 82.11(7)  | O5              | Ca1  | C1 <sup>3</sup>  | 74.87(8)  |
| O4               | Ca2  | O7 <sup>1</sup>  | 122.36(7) | O11             | Ca1  | Ca2              | 78.10(8)  |
| O4               | Ca2  | O3               | 51.95(7)  | O11             | Ca1  | Ca1 <sup>2</sup> | 152.09(8) |
| O4               | Ca2  | C10 <sup>1</sup> | 101.10(7) | O11             | Ca1  | O2 <sup>3</sup>  | 120.33(9) |
| O6               | Ca2  | Ca2 <sup>1</sup> | 115.14(5) | O11             | Ca1  | O2 <sup>4</sup>  | 154.75(8) |
| O6               | Ca2  | Ca1              | 40.90(5)  | O11             | Ca1  | O6               | 72.24(8)  |
| O6               | Ca2  | O8 <sup>1</sup>  | 155.12(7) | O11             | Ca1  | O1 <sup>3</sup>  | 78.82(9)  |
| O6               | Ca2  | O4               | 75.34(7)  | O11             | Ca1  | O5               | 120.20(8) |
| O6               | Ca2  | O7               | 77.70(7)  | O11             | Ca1  | C1 <sup>3</sup>  | 102.00(9) |
| O6               | Ca2  | O7 <sup>1</sup>  | 150.95(7) | O12             | Ca1  | Ca2              | 115.31(7) |
| O6               | Ca2  | O3               | 100.15(7) | O12             | Ca1  | Ca1 <sup>2</sup> | 85.48(8)  |
| O6               | Ca2  | O9               | 82.88(7)  | O12             | Ca1  | O4               | 83.54(8)  |
| O6               | Ca2  | O10              | 89.15(8)  | O12             | Ca1  | O2 <sup>3</sup>  | 92.28(8)  |
| O6               | Ca2  | C10 <sup>1</sup> | 171.46(8) | O12             | Ca1  | O2 <sup>4</sup>  | 80.30(9)  |
| O7 <sup>1</sup>  | Ca2  | Ca2 <sup>1</sup> | 36.03(5)  | O12             | Ca1  | O6               | 142.73(9) |
| O7               | Ca2  | Ca2 <sup>1</sup> | 37.56(5)  | O12             | Ca1  | O1 <sup>3</sup>  | 114.16(9) |
| O7               | Ca2  | Ca1              | 99.64(5)  | O12             | Ca1  | O5               | 160.04(9) |

| Atom             | Atom | Atom             | Angle/°   | Atom             | Atom | Atom             | Angle/°    |
|------------------|------|------------------|-----------|------------------|------|------------------|------------|
| O7 <sup>1</sup>  | Ca2  | Ca1              | 149.79(5) | O12              | Ca1  | O11              | 79.17(10)  |
| O7 <sup>1</sup>  | Ca2  | O8 <sup>1</sup>  | 52.83(7)  | O12              | Ca1  | C1 <sup>3</sup>  | 107.52(9)  |
| O7               | Ca2  | O8 <sup>1</sup>  | 122.99(7) | C1 <sup>3</sup>  | Ca1  | Ca2              | 136.17(6)  |
| O7               | Ca2  | O4               | 117.51(7) | C1 <sup>3</sup>  | Ca1  | Ca1 <sup>2</sup> | 60.65(6)   |
| O7               | Ca2  | O7 <sup>1</sup>  | 73.59(8)  | C10              | O8   | Ca2 <sup>1</sup> | 91.77(16)  |
| O7               | Ca2  | O3               | 79.72(7)  | Ca1              | O4   | Ca2              | 110.08(8)  |
| O7 <sup>1</sup>  | Ca2  | O3               | 79.15(7)  | C5               | O4   | Ca2              | 94.27(16)  |
| O7               | Ca2  | O9               | 148.86(7) | C5               | O4   | Ca1              | 119.16(17) |
| O7               | Ca2  | O10              | 79.36(8)  | Ca1 <sup>4</sup> | O2   | Ca1 <sup>5</sup> | 105.03(7)  |
| O7               | Ca2  | C10 <sup>1</sup> | 97.53(7)  | C1               | O2   | Ca1 <sup>4</sup> | 147.28(19) |
| O7 <sup>1</sup>  | Ca2  | C10 <sup>1</sup> | 26.59(7)  | C1               | O2   | Ca1 <sup>5</sup> | 93.89(17)  |
| O3               | Ca2  | Ca2 <sup>1</sup> | 76.76(5)  | Ca2              | O6   | Ca1              | 103.15(7)  |
| O3               | Ca2  | Ca1              | 70.65(5)  | C6               | O6   | Ca2              | 115.10(17) |
| O3               | Ca2  | C10 <sup>1</sup> | 71.85(7)  | C6               | O6   | Ca1              | 86.41(16)  |
| O9               | Ca2  | Ca2 <sup>1</sup> | 148.15(6) | Ca2              | O7   | Ca2 <sup>1</sup> | 106.41(7)  |
| O9               | Ca2  | Ca1              | 80.42(6)  | C10              | O7   | Ca2              | 147.59(18) |
| O9               | Ca2  | O8 <sup>1</sup>  | 82.97(7)  | C10              | O7   | Ca2 <sup>1</sup> | 92.51(16)  |
| O9               | Ca2  | O4               | 79.94(8)  | C5               | O3   | Ca2              | 87.17(17)  |
| O9               | Ca2  | O7 <sup>1</sup>  | 120.72(8) | C1               | O1   | Ca1 <sup>5</sup> | 91.17(16)  |
| O9               | Ca2  | O3               | 128.02(7) | C6               | O5   | Ca1              | 96.73(18)  |
| O9               | Ca2  | O10              | 76.22(8)  | C11              | O12  | Ca1              | 152.0(3)   |
| O9               | Ca2  | C10 <sup>1</sup> | 104.31(8) | O2               | C1   | Ca1 <sup>5</sup> | 60.34(14)  |
| O10              | Ca2  | Ca2 <sup>1</sup> | 77.97(6)  | O4               | Ca1  | Ca2              | 35.43(5)   |
| O10              | Ca2  | Ca1              | 127.09(7) | O4               | Ca1  | Ca1 <sup>2</sup> | 115.32(5)  |
| O10              | Ca2  | O8 <sup>1</sup>  | 107.14(9) | O4               | Ca1  | O2 <sup>3</sup>  | 152.03(7)  |
| O10              | Ca2  | O4               | 152.97(8) | O4               | Ca1  | O2 <sup>4</sup>  | 77.07(7)   |
| O10              | Ca2  | O7 <sup>1</sup>  | 81.39(8)  | O4               | Ca1  | O6               | 71.33(7)   |
| O10              | Ca2  | O3               | 154.69(8) | O4               | Ca1  | O1 <sup>3</sup>  | 153.68(7)  |
| O10              | Ca2  | C10 <sup>1</sup> | 96.99(9)  | O4               | Ca1  | O5               | 92.54(7)   |
| C10 <sup>1</sup> | Ca2  | Ca2 <sup>1</sup> | 60.80(6)  | O4               | Ca1  | O11              | 86.13(9)   |
| C10 <sup>1</sup> | Ca2  | Ca1              | 134.84(6) | O4               | Ca1  | C1 <sup>3</sup>  | 167.21(8)  |
| Ca1 <sup>2</sup> | Ca1  | Ca2              | 129.76(3) | O2 <sup>4</sup>  | Ca1  | Ca2              | 97.74(5)   |
| O2 <sup>3</sup>  | Ca1  | Ca2              | 150.19(5) | O2 <sup>4</sup>  | Ca1  | C1 <sup>3</sup>  | 98.09(8)   |
| O2 <sup>3</sup>  | Ca1  | Ca1 <sup>2</sup> | 36.72(5)  | O2 <sup>3</sup>  | Ca1  | C1 <sup>3</sup>  | 25.77(7)   |
| O2 <sup>4</sup>  | Ca1  | Ca1 <sup>2</sup> | 38.25(5)  | O6               | Ca1  | Ca2              | 35.95(4)   |
| O2 <sup>4</sup>  | Ca1  | O2 <sup>3</sup>  | 74.97(7)  | O6               | Ca1  | Ca1 <sup>2</sup> | 129.85(5)  |
| O2 <sup>3</sup>  | Ca1  | O6               | 122.64(6) | O6               | Ca1  | C1 <sup>3</sup>  | 101.51(7)  |
| O2 <sup>4</sup>  | Ca1  | O6               | 118.47(7) | O1 <sup>3</sup>  | Ca1  | Ca2              | 119.27(6)  |
| O2 <sup>3</sup>  | Ca1  | O1 <sup>3</sup>  | 51.26(7)  | O1 <sup>3</sup>  | Ca1  | Ca1 <sup>2</sup> | 86.54(5)   |
| O2 <sup>4</sup>  | Ca1  | O1 <sup>3</sup>  | 123.41(7) | C8               | C10  | Ca2 <sup>1</sup> | 170.81(18) |

| Atom            | Atom | Atom | Angle/°  | Atom | Atom | Atom             | Angle/°   |
|-----------------|------|------|----------|------|------|------------------|-----------|
| O2 <sup>4</sup> | Ca1  | O5   | 79.75(7) | O7   | C10  | Ca2 <sup>1</sup> | 60.90(14) |

Symmetry transformations used to generate equivalent atoms: <sup>1</sup>2-X,1-Y,1-Z; <sup>2</sup>1-X,-Y,-Z; <sup>3</sup>+X,-1+Y,+Z; <sup>4</sup>1-X,1-Y,-Z; <sup>5</sup>+X,1+Y,+Z.

**Table S8.** Bond Lengths (Å) for **Ca-MOF 4**.

| Atom | Atom             | Length/Å  | Atom | Atom             | Length/Å  |
|------|------------------|-----------|------|------------------|-----------|
| Ca2  | Ca1 <sup>1</sup> | 3.606(11) | Ca2  | O10              | 2.438(11) |
| Ca2  | Ca1              | 3.607(10) | Ca1  | O6 <sup>2</sup>  | 2.569(15) |
| Ca2  | O6 <sup>2</sup>  | 2.344(14) | Ca1  | O12 <sup>2</sup> | 2.337(13) |
| Ca2  | O12              | 2.548(14) | Ca1  | O13              | 2.347(14) |
| Ca2  | O13              | 2.455(14) | Ca1  | O5 <sup>2</sup>  | 2.464(13) |
| Ca2  | O5               | 2.344(13) | Ca1  | O14              | 2.579(13) |
| Ca2  | O11              | 2.408(11) | Ca1  | O9 <sup>2</sup>  | 2.539(13) |
| Ca2  | O14              | 2.552(13) | Ca1  | O15              | 2.405(11) |
| Ca2  | O9               | 2.581(14) | Ca1  | O16              | 2.439(10) |

Symmetry transformations used to generate equivalent atoms: <sup>1</sup>1+X,+Y,+Z; <sup>2</sup>-1+X,+Y,+Z.

**Table S9.** Bond Angles (°) for **Ca-MOF 4**.

| Atom             | Atom | Atom             | Angle/°  | Atom | Atom | Atom             | Angle/°  |
|------------------|------|------------------|----------|------|------|------------------|----------|
| Ca1 <sup>1</sup> | Ca2  | Ca1              | 129.6(2) | O15  | Ca1  | Ca2 <sup>2</sup> | 111.3(4) |
| O6 <sup>2</sup>  | Ca2  | Ca1              | 45.3(3)  | O15  | Ca1  | Ca2              | 108.7(4) |
| O6 <sup>2</sup>  | Ca2  | Ca1 <sup>1</sup> | 169.4(3) | O15  | Ca1  | O6 <sup>2</sup>  | 142.6(4) |
| O6 <sup>2</sup>  | Ca2  | O12              | 131.7(4) | O15  | Ca1  | O5 <sup>2</sup>  | 149.1(4) |
| O6 <sup>2</sup>  | Ca2  | O13              | 80.1(4)  | O15  | Ca1  | O14              | 77.1(4)  |
| O6 <sup>2</sup>  | Ca2  | O11              | 80.8(5)  | O15  | Ca1  | O9 <sup>2</sup>  | 81.7(4)  |
| O6 <sup>2</sup>  | Ca2  | O14              | 69.3(5)  | O15  | Ca1  | O16              | 111.9(4) |
| O6 <sup>2</sup>  | Ca2  | O9               | 144.1(4) | O15  | Ca1  | C13 <sup>2</sup> | 154.9(3) |
| O6 <sup>2</sup>  | Ca2  | O10              | 75.2(5)  | O16  | Ca1  | Ca2              | 97.4(3)  |
| O12              | Ca2  | Ca1              | 90.1(4)  | O16  | Ca1  | Ca2 <sup>2</sup> | 94.9(4)  |
| O12              | Ca2  | Ca1 <sup>1</sup> | 40.2(3)  | O16  | Ca1  | O6 <sup>2</sup>  | 95.8(4)  |
| O12              | Ca2  | O14              | 93.6(4)  | O16  | Ca1  | O5 <sup>2</sup>  | 86.7(4)  |
| O12              | Ca2  | O9               | 65.3(4)  | O16  | Ca1  | O14              | 140.0(4) |
| O13              | Ca2  | Ca1 <sup>1</sup> | 92.0(3)  | O16  | Ca1  | O9 <sup>2</sup>  | 139.5(4) |
| O13              | Ca2  | Ca1              | 40.2(3)  | O16  | Ca1  | C13 <sup>2</sup> | 93.2(4)  |

| Atom             | Atom | Atom             | Angle/°  | Atom             | Atom | Atom             | Angle/°   |
|------------------|------|------------------|----------|------------------|------|------------------|-----------|
| O13              | Ca2  | O12              | 51.8(4)  | C13 <sup>2</sup> | Ca1  | Ca2              | 67.3(4)   |
| O13              | Ca2  | O14              | 68.5(4)  | C13 <sup>2</sup> | Ca1  | Ca2 <sup>2</sup> | 63.4(4)   |
| O13              | Ca2  | O9               | 104.5(4) | Ca2 <sup>1</sup> | O6   | Ca1 <sup>1</sup> | 94.4(4)   |
| O5               | Ca2  | Ca1              | 160.5(3) | C13              | O6   | Ca2 <sup>1</sup> | 175.7(10) |
| O5               | Ca2  | Ca1 <sup>1</sup> | 42.7(3)  | C13              | O6   | Ca1 <sup>1</sup> | 89.9(9)   |
| O5               | Ca2  | O6 <sup>2</sup>  | 137.7(4) | Ca1 <sup>1</sup> | O12  | Ca2              | 95.0(5)   |
| O5               | Ca2  | O12              | 77.6(4)  | C12              | O12  | Ca2              | 91.5(10)  |
| O5               | Ca2  | O13              | 122.8(4) | C12              | O12  | Ca1 <sup>1</sup> | 173.4(11) |
| O5               | Ca2  | O11              | 87.9(4)  | Ca1              | O13  | Ca2              | 97.3(4)   |
| O5               | Ca2  | O14              | 148.8(4) | C12              | O13  | Ca2              | 95.4(9)   |
| O5               | Ca2  | O9               | 69.8(4)  | C12              | O13  | Ca1              | 152.3(10) |
| O5               | Ca2  | O10              | 71.4(5)  | Ca2              | O5   | Ca1 <sup>1</sup> | 97.1(5)   |
| O11              | Ca2  | Ca1              | 110.6(4) | C13              | O5   | Ca2              | 150.4(10) |
| O11              | Ca2  | Ca1 <sup>1</sup> | 109.3(4) | C13              | O5   | Ca1 <sup>1</sup> | 96.7(9)   |
| O11              | Ca2  | O12              | 143.0(4) | Ca2              | O14  | Ca1              | 89.3(4)   |
| O11              | Ca2  | O13              | 148.4(4) | Ca1 <sup>1</sup> | O9   | Ca2              | 89.5(4)   |
| O11              | Ca2  | O14              | 81.3(4)  | O13              | Ca1  | O6 <sup>2</sup>  | 77.7(4)   |
| O11              | Ca2  | O9               | 77.7(4)  | O13              | Ca1  | O5 <sup>2</sup>  | 122.8(4)  |
| O11              | Ca2  | O10              | 111.3(4) | O13              | Ca1  | O14              | 69.6(4)   |
| O14              | Ca2  | Ca1              | 45.6(3)  | O13              | Ca1  | O9 <sup>2</sup>  | 148.5(4)  |
| O14              | Ca2  | Ca1 <sup>1</sup> | 114.5(3) | O13              | Ca1  | O15              | 87.2(5)   |
| O14              | Ca2  | O9               | 79.3(3)  | O13              | Ca1  | O16              | 71.9(5)   |
| O9               | Ca2  | Ca1              | 118.8(3) | O13              | Ca1  | C13 <sup>2</sup> | 102.3(5)  |
| O9               | Ca2  | Ca1 <sup>1</sup> | 44.8(3)  | O5 <sup>2</sup>  | Ca1  | Ca2 <sup>2</sup> | 40.2(3)   |
| O10              | Ca2  | Ca1 <sup>1</sup> | 97.6(4)  | O5 <sup>2</sup>  | Ca1  | Ca2              | 92.1(4)   |
| O10              | Ca2  | Ca1              | 95.4(4)  | O5 <sup>2</sup>  | Ca1  | O6 <sup>2</sup>  | 51.8(3)   |
| O10              | Ca2  | O12              | 96.2(4)  | O5 <sup>2</sup>  | Ca1  | O14              | 104.9(4)  |
| O10              | Ca2  | O13              | 87.6(4)  | O5 <sup>2</sup>  | Ca1  | O9 <sup>2</sup>  | 68.8(4)   |
| O10              | Ca2  | O14              | 139.8(4) | O5 <sup>2</sup>  | Ca1  | C13 <sup>2</sup> | 25.1(4)   |
| O10              | Ca2  | O9               | 139.7(4) | O14              | Ca1  | Ca2              | 45.0(3)   |
| Ca2 <sup>2</sup> | Ca1  | Ca2              | 129.6(2) | O14              | Ca1  | Ca2 <sup>2</sup> | 118.8(3)  |
| O6 <sup>2</sup>  | Ca1  | Ca2 <sup>2</sup> | 89.9(3)  | O14              | Ca1  | C13 <sup>2</sup> | 84.5(4)   |
| O6 <sup>2</sup>  | Ca1  | Ca2              | 40.4(3)  | O9 <sup>2</sup>  | Ca1  | Ca2 <sup>2</sup> | 45.7(3)   |
| O6 <sup>2</sup>  | Ca1  | O14              | 65.6(4)  | O9 <sup>2</sup>  | Ca1  | Ca2              | 114.6(3)  |
| O6 <sup>2</sup>  | Ca1  | C13 <sup>2</sup> | 26.9(4)  | O9 <sup>2</sup>  | Ca1  | O6 <sup>2</sup>  | 93.5(4)   |
| O12 <sup>2</sup> | Ca1  | Ca2 <sup>2</sup> | 44.7(4)  | O9 <sup>2</sup>  | Ca1  | O14              | 79.2(3)   |
| O12 <sup>2</sup> | Ca1  | Ca2              | 169.0(3) | O9 <sup>2</sup>  | Ca1  | C13 <sup>2</sup> | 78.2(4)   |
| O12 <sup>2</sup> | Ca1  | O6 <sup>2</sup>  | 131.0(4) | O12 <sup>2</sup> | Ca1  | C13 <sup>2</sup> | 104.5(5)  |
| O12 <sup>2</sup> | Ca1  | O13              | 138.3(4) | O13              | Ca1  | Ca2              | 42.5(3)   |
| O12 <sup>2</sup> | Ca1  | O5 <sup>2</sup>  | 79.4(5)  | O13              | Ca1  | Ca2 <sup>2</sup> | 160.6(3)  |

| Atom             | Atom | Atom            | Angle/°  | Atom             | Atom | Atom | Angle/° |
|------------------|------|-----------------|----------|------------------|------|------|---------|
| O12 <sup>2</sup> | Ca1  | O14             | 144.0(4) | O12 <sup>2</sup> | Ca1  | O15  | 81.9(5) |
| O12 <sup>2</sup> | Ca1  | O9 <sup>2</sup> | 69.0(4)  | O12 <sup>2</sup> | Ca1  | O16  | 75.3(5) |

Symmetry transformations used to generate equivalent atoms: <sup>1</sup>1+X,+Y,+Z; <sup>2</sup>-1+X,+Y,+Z.

**Table S10.** Hydrogen bonds for **Ca-MOF-4** (Å) and (°).

| D-H...A       | d(D-H) | d(H...A) | d(D...A)  | ∠(DHA) | Symmetry Code |
|---------------|--------|----------|-----------|--------|---------------|
| O9-H9A...O7   | 0.99   | 1.76     | 2.702(19) | 159    | x,1+y,-1+z    |
| O9-H9B...O2   | 0.99   | 1.74     | 2.697(18) | 161    | x,y,1+z       |
| O10-H10A...O1 | 0.87   | 2.19     | 2.812(18) | 128    | -1+x,-1+y,1+z |
| O10-H10A...O6 | 0.87   | 2.50     | 2.912(18) | 110    | -1+x,y,z      |
| O11-H11A...O2 | 0.88   | 1.91     | 2.739(19) | 155    | x,y,1+z       |
| O11-H11B...O1 | 0.89   | 1.99     | 2.771(19) | 147    | -1+x,y,1+z    |
| O14-H14A...O8 | 0.99   | 1.76     | 2.722(18) | 162    | 1+x,1+y,-1+z  |
| O14-H14B...O1 | 0.99   | 1.77     | 2.714(19) | 159    | x,y,1+z       |
| O15-H15A...O8 | 0.87   | 1.92     | 2.753(19) | 160    | 1+x,1+y,-1+z  |
| O15-H15B...O7 | 0.88   | 1.91     | 2.76(2)   | 164    | x,1+y,-1+z    |
| O16-H16A...O7 | 0.87   | 2.05     | 2.777(19) | 140    | x,y,-1+z      |
| O16-H16B...O8 | 0.87   | 2.32     | 3.134(19) | 156    | 1+x,y,-1+z    |

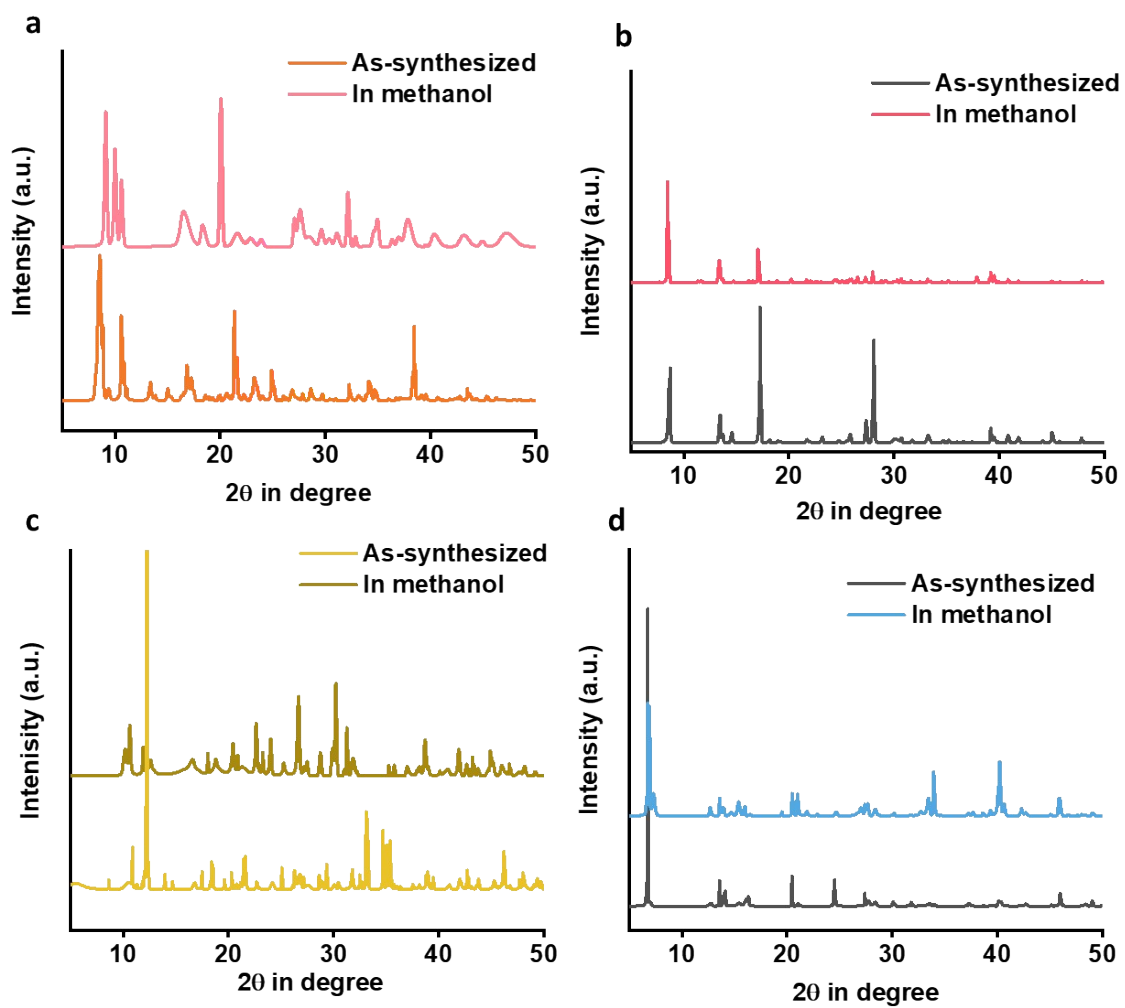

**Figure S5.** PXRD pattern of Ca-MOF-1 (a), Ca-MOF-2 (b), Ca-MOF-3 (c) and Ca-MOF-4 (d) in methanol.



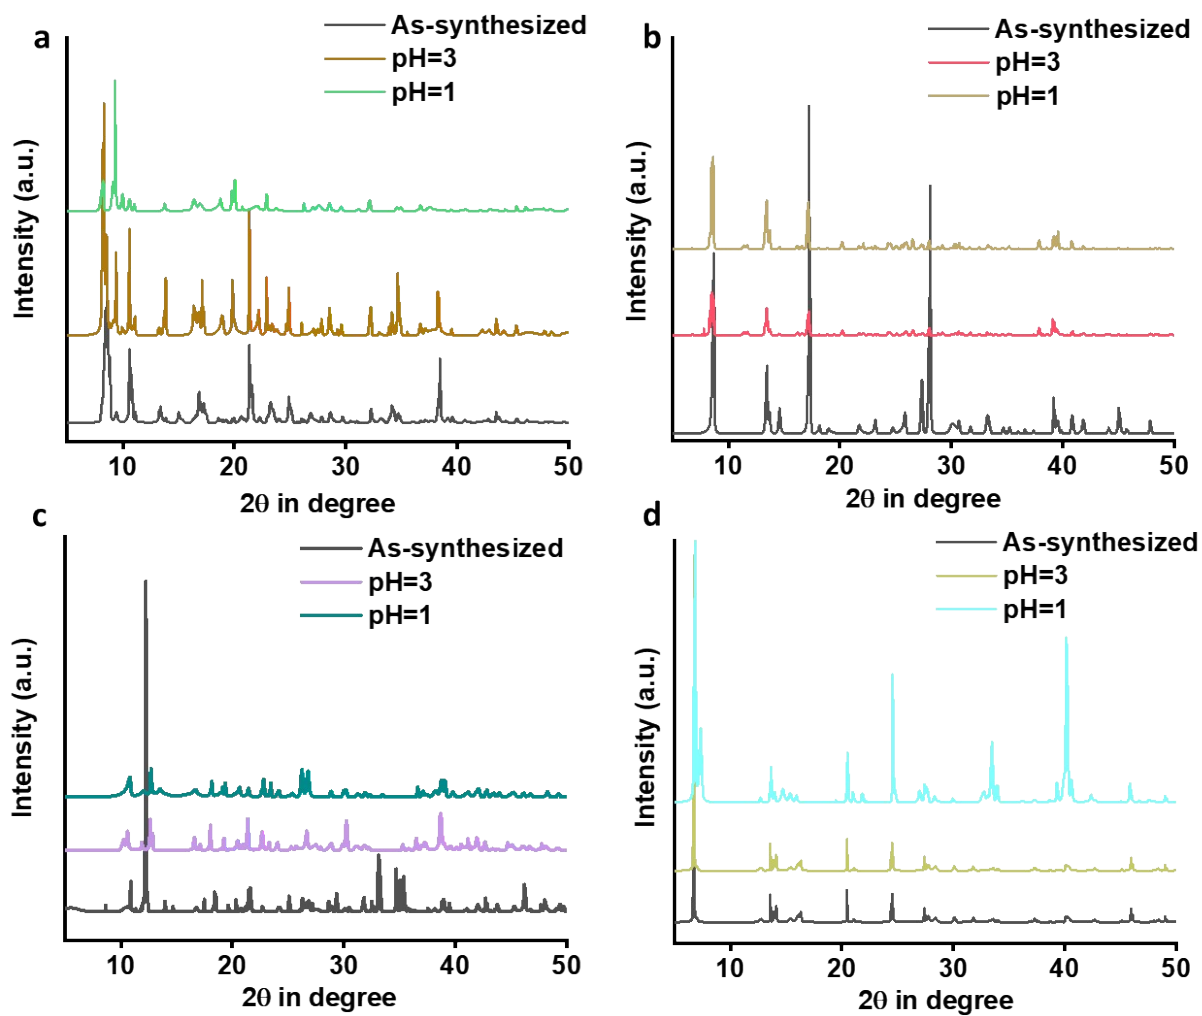

**Figure S6.** PXRD pattern of Ca-MOF-1 (a), Ca-MOF-2 (b), Ca-MOF-3 (c) and Ca-MOF-4 (d) at different pH medium.

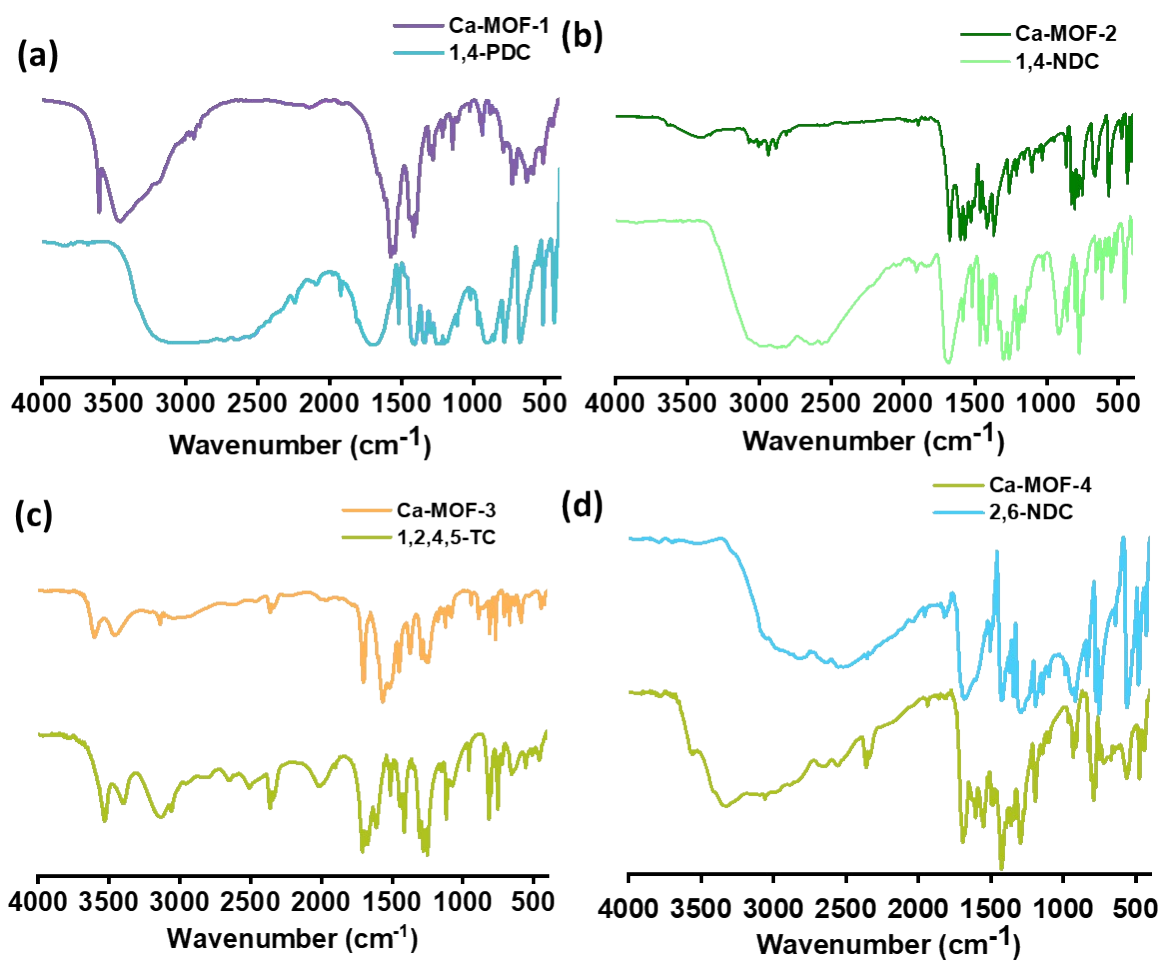

**Figure S7.** FT-IR of Ca-MOF-1 (a), Ca-MOF-2 (b), Ca-MOF-3 (c) and Ca-MOF-4 (d).

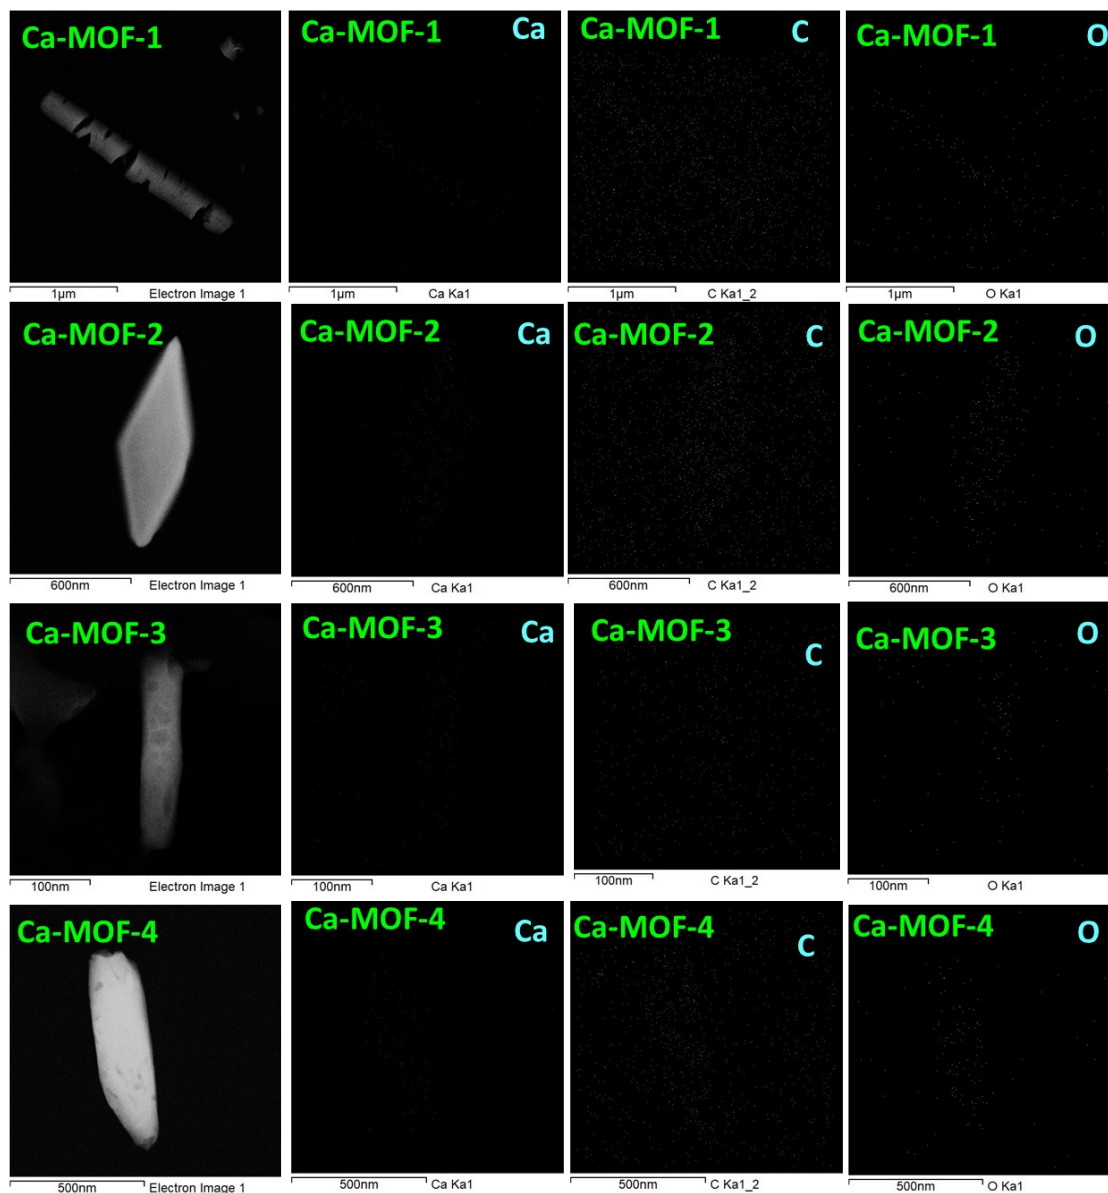

**Figure S8.** Elemental mapping of Ca-MOFs.

## Thermo-gravimetric analysis

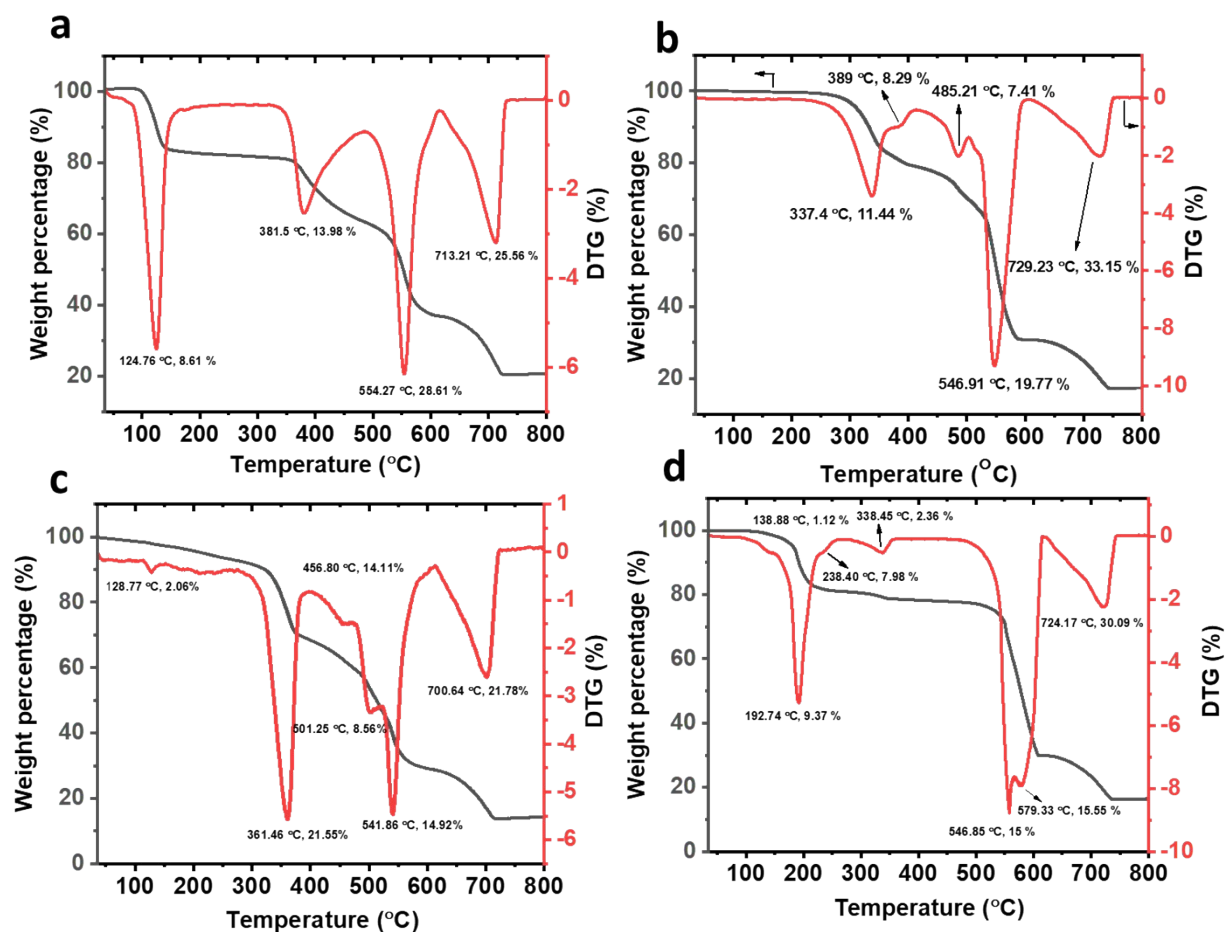

**Figure S9.** TGA and DTG plot of Ca-MOF-1 (a), Ca-MOF-2 (b), Ca-MOF-3 (c) and Ca-MOF-4 (d).

### QTAIM Analysis:

QTAIM analysis is the topological analysis of atoms in a molecule. This formalism is employed by AIMAll program, where the classical definition of a 'bond' is considered to be the 'bond path', indicating a line of maximum electron density linking the bonded pairs of atoms in an equilibrium geometry. The interaction of two atoms at a certain distance creates a critical point (Bond Critical Point-BCP) in the electron density [ $\rho(r)$ ] where the gradient  $\nabla\rho(r)$  vanishes. The strength of this interaction in varied molecular systems largely depends upon two important parameters, viz., electron density and its Laplacian [ $\nabla^2\rho(r)$ ] at the concerned BCP.

Electronic energy density [ $H(r)$ ] is defined as

$$H(r) = G(r) + V(r)$$

Where  $H(r)$ ,  $G(r)$  and  $V(r)$  are the electronic, kinetic and potential energy densities, respectively. The ratio  $[-G(r)/V(r)]$  predicts the nature of the bonding interaction.  $[-G(r)/V(r)] > 1$  indicates non-covalent interaction whereas  $0.5 < [-G(r)/V(r)] < 1$  specifies partly covalent interaction. Negative values of both  $\nabla^2\rho(r)$  and  $H(r)$  indicate the interaction to be strong, for medium interaction  $H(r)$  is negative but  $\nabla^2\rho(r)$  is positive, and the interactions are weak when both are positive.

**Table S11:** AIM analysis of **EM-2** concerning the epoxide binding with the metal centre, at B3LYP/6-31G (d,p) level.

| System | BCP      | $\rho(r)$ | $\nabla^2\rho(r)$ | G     | V      | H     | -G/V  |
|--------|----------|-----------|-------------------|-------|--------|-------|-------|
| EM-2   | O74-Ca22 | 0.025     | 0.120             | 0.027 | -0.024 | 0.003 | 1.121 |

## Chromatography data

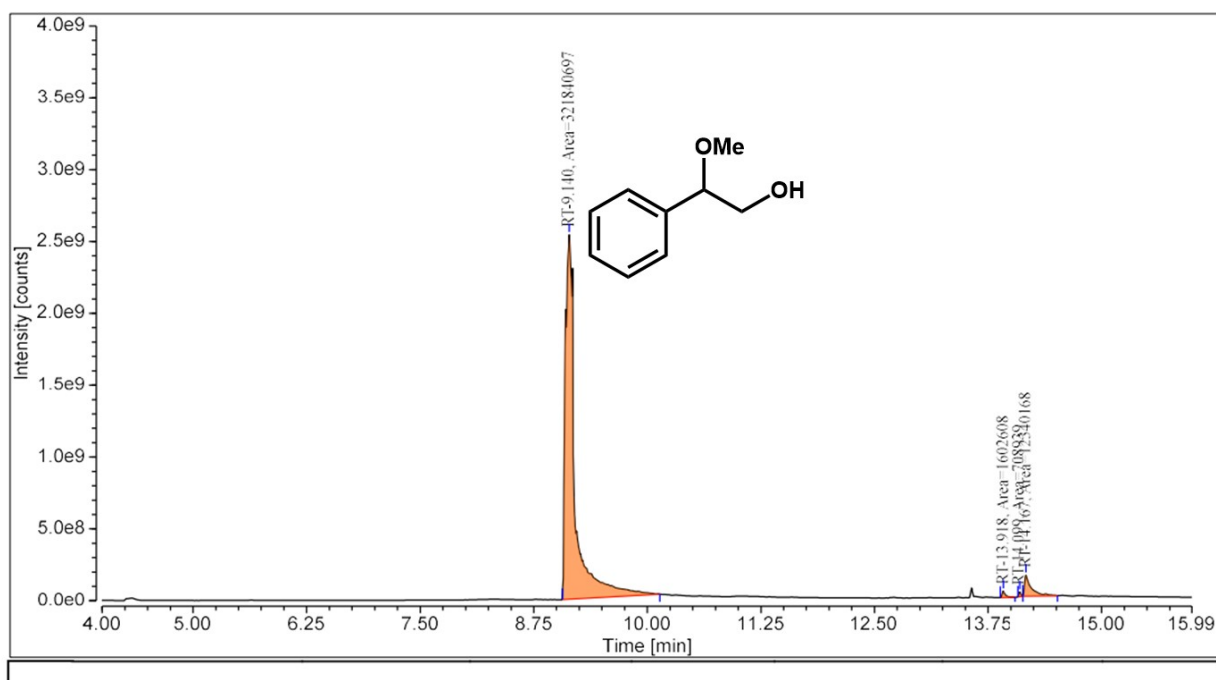

Figure S10: GC analysis of styrene oxide conversion under standard conditions.

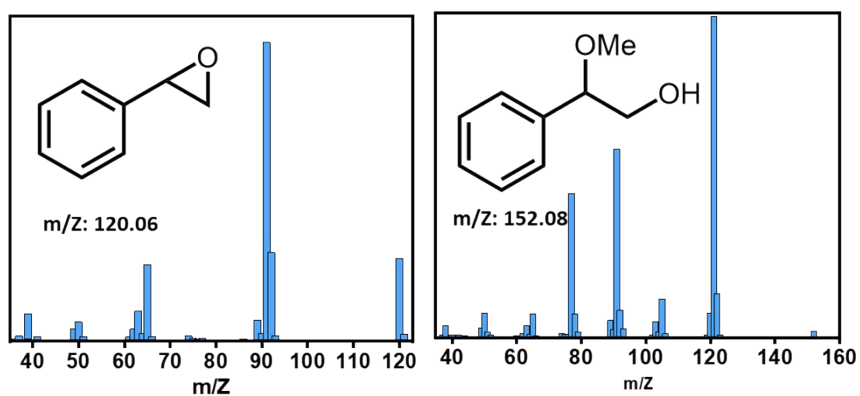

Figure S11: Mass fragmentation of styrene oxide and the reaction product.

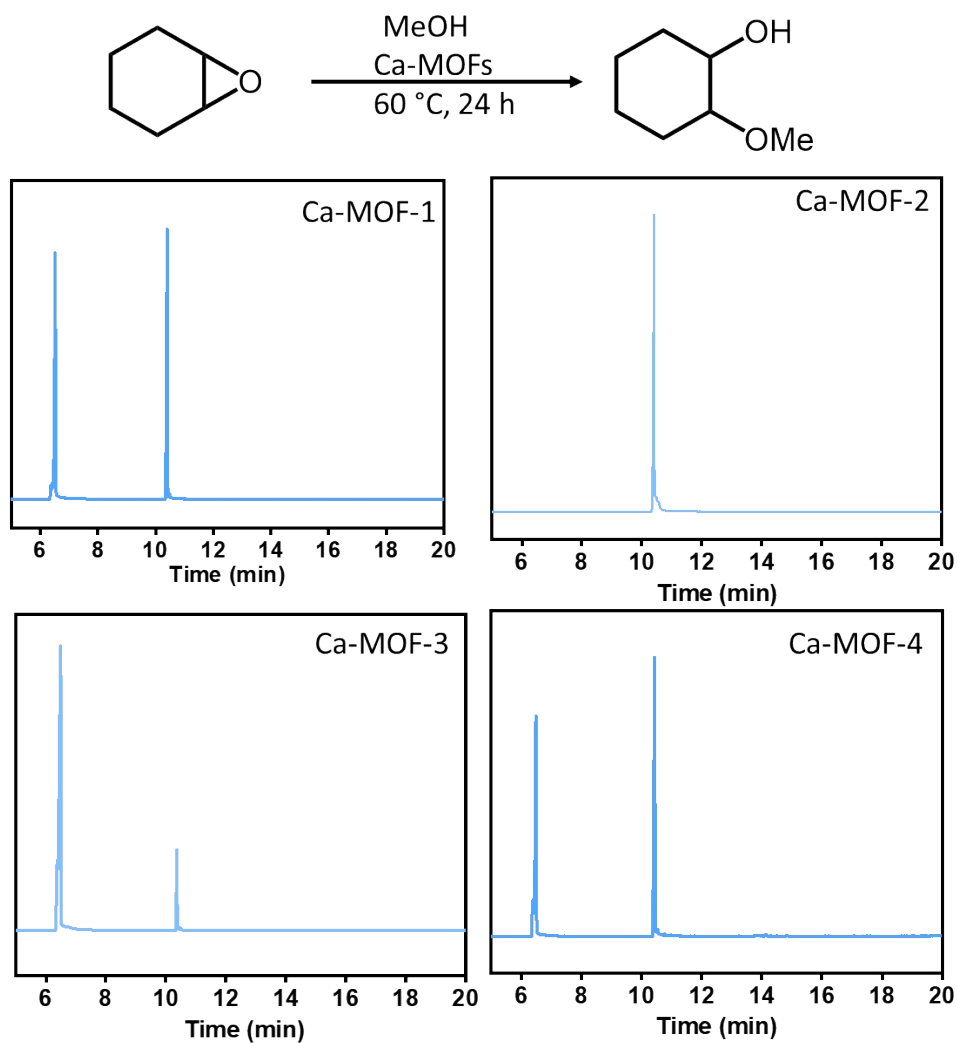

**Figure S12:** GC analysis of cyclohexane oxide using over different Ca-MOFs.

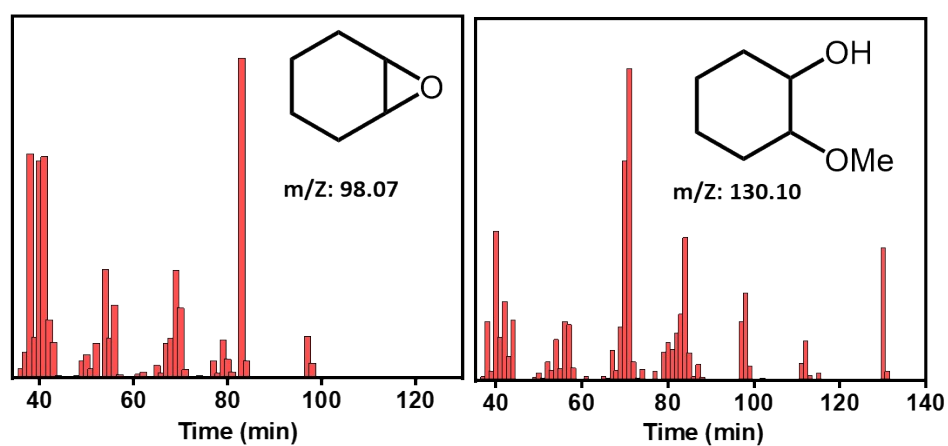

**Figure S13:** Mass fragmentation of cyclohexane oxide and the reaction product.

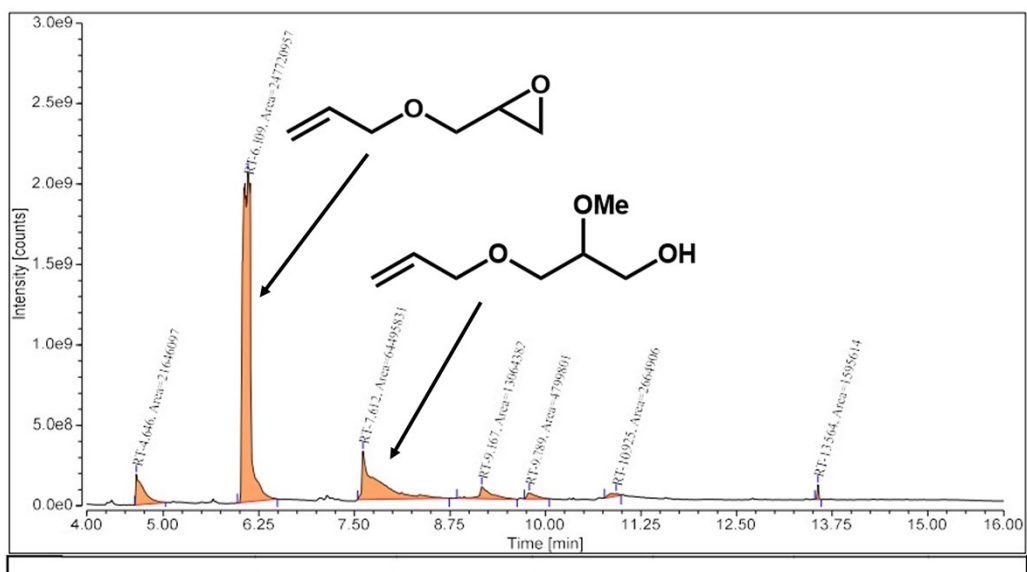

**Figure S14:** GC analysis for the allyl-glycidyl ether conversion.

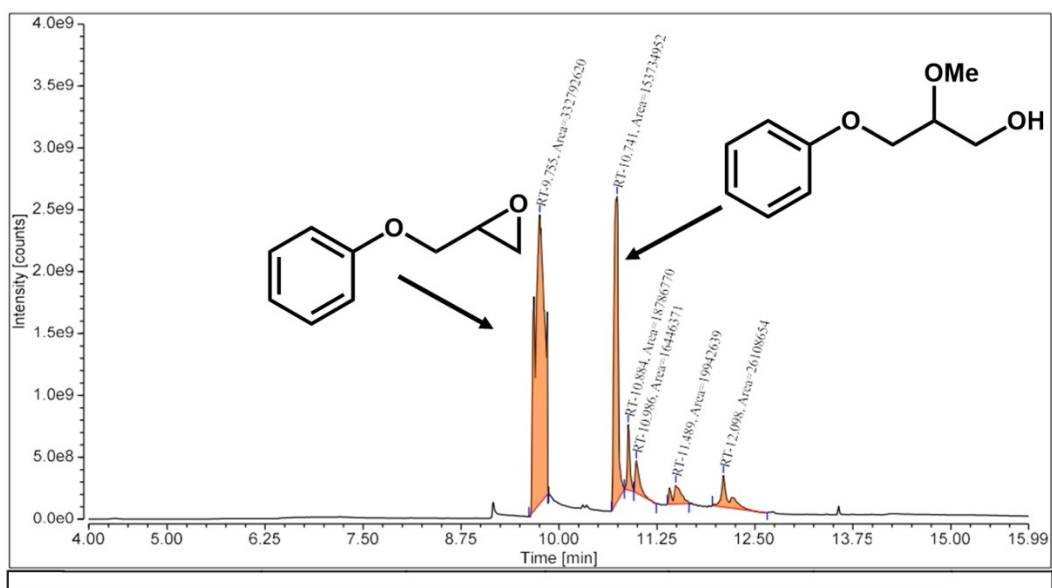

**Figure S15:** GC analysis for the phenyl glycidyl ether conversion.



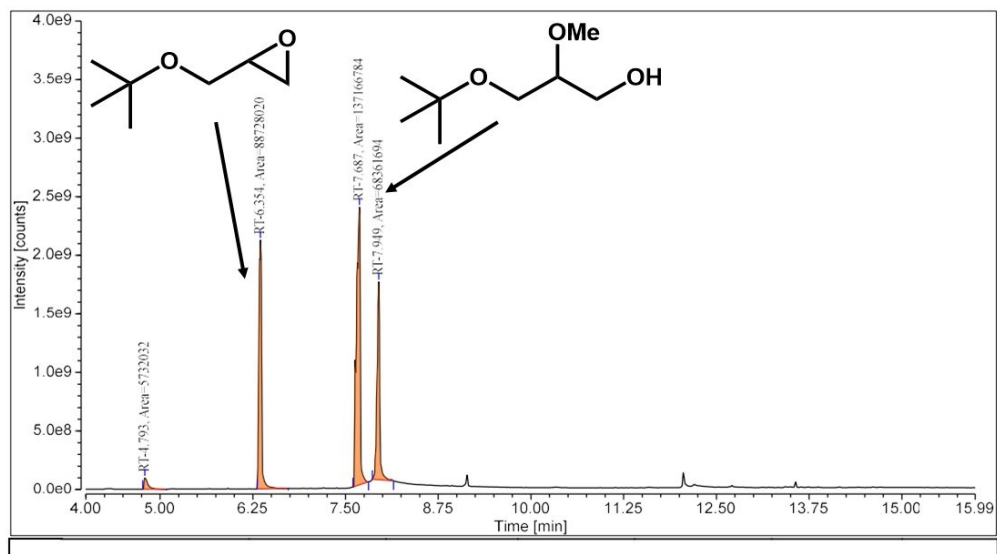

**Figure S16:** GC analysis of the reaction mixture for tertiary butyl-glycidyl ether.

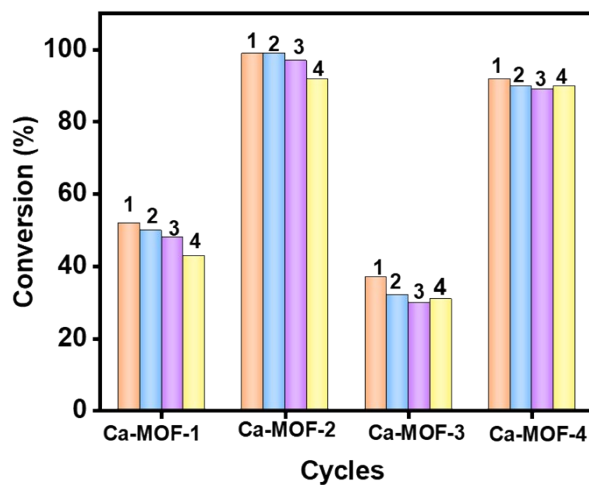

**Figure S17:** Recyclability of Ca-MOFs for consecutive four reaction cycles in the methanolysis of styrene oxide.

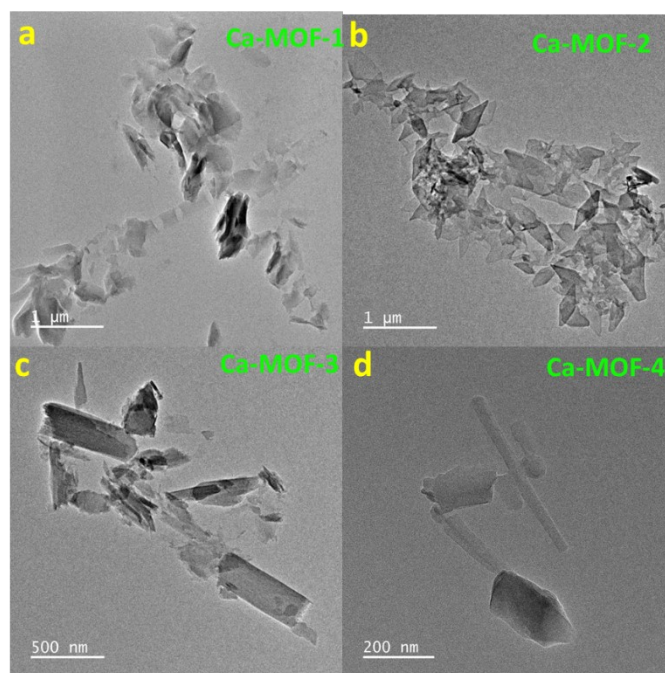

**Figure S18.** TEM images of Ca-MOFs after catalysis.

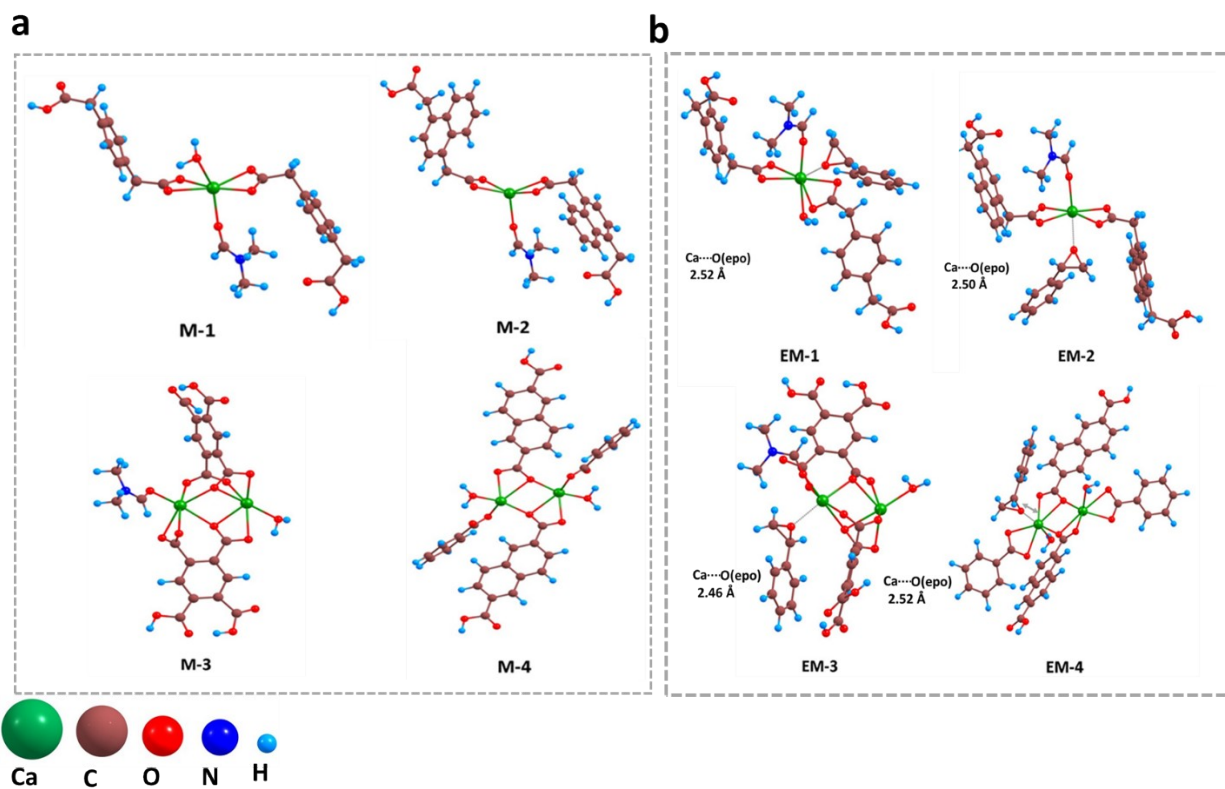

**Figure S19.** DFT optimized structures of the model MOF structures (a) and corresponding epoxide bonded complexes (b).

## Cartesian Co-ordinates

M-1

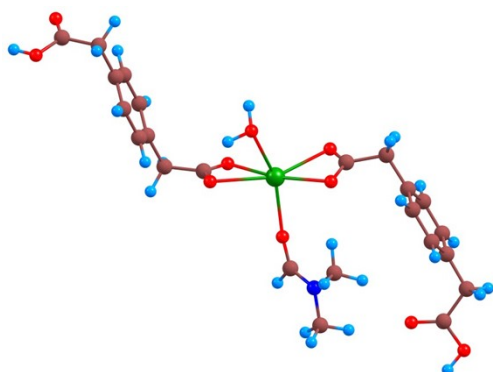

O 1

|    |              |             |             |
|----|--------------|-------------|-------------|
| C  | -5.31392800  | 1.05589300  | -0.79938300 |
| C  | -5.05694100  | 1.12306500  | 0.57700000  |
| C  | -5.91476500  | 0.43546100  | 1.44520400  |
| C  | -6.99692100  | -0.29584200 | 0.95748600  |
| C  | -7.24962900  | -0.36173500 | -0.41791100 |
| C  | -6.39655200  | 0.32567200  | -1.28826500 |
| H  | -4.65279500  | 1.57403400  | -1.48689900 |
| H  | -5.73385200  | 0.47462200  | 2.51607900  |
| H  | -7.65905900  | -0.81127200 | 1.64749500  |
| H  | -6.58154600  | 0.29230500  | -2.35898100 |
| C  | -8.43218100  | -1.15941500 | -0.94810700 |
| H  | -8.41639900  | -1.17724500 | -2.04021100 |
| H  | -8.39554100  | -2.18835800 | -0.57839300 |
| C  | -3.86872100  | 1.89935900  | 1.11141900  |
| H  | -3.82611900  | 2.88569700  | 0.63594400  |
| C  | -9.74514500  | -0.56844500 | -0.46941700 |
| O  | -10.28974800 | -0.83238700 | 0.58013000  |
| O  | -10.24248600 | 0.33884900  | -1.34353000 |
| H  | -11.04959000 | 0.69319400  | -0.93263700 |
| C  | -2.54661200  | 1.18471300  | 0.80827400  |
| O  | -2.16769700  | 1.12812100  | -0.41378100 |
| O  | -1.89917300  | 0.66046000  | 1.75593800  |
| H  | -3.95356300  | 2.03432200  | 2.19128200  |
| Ca | -0.16996400  | -0.18574000 | 0.29730400  |
| C  | 5.04631900   | -2.17616700 | 1.26975700  |
| C  | 4.27620700   | -2.51195800 | 0.14915800  |
| C  | 4.78735000   | -2.20811900 | -1.11953500 |
| C  | 6.02612800   | -1.58559100 | -1.26075600 |
| C  | 6.78893300   | -1.24042900 | -0.13882600 |
| C  | 6.28361000   | -1.54942600 | 1.12833100  |
| H  | 4.67263100   | -2.41004500 | 2.26310900  |
| H  | 4.20292100   | -2.45644300 | -1.99998800 |

|   |             |             |             |
|---|-------------|-------------|-------------|
| H | 6.40517600  | -1.36597700 | -2.25618700 |
| H | 6.86300200  | -1.30105700 | 2.01451600  |
| C | 8.12089100  | -0.54661700 | -0.28698600 |
| H | 8.81377000  | -0.82729700 | 0.51372700  |
| H | 8.61838000  | -0.83518900 | -1.22170100 |
| C | 2.91418200  | -3.14865000 | 0.31221600  |
| H | 2.85073500  | -3.69918700 | 1.25286300  |
| H | 2.72824100  | -3.84723000 | -0.51134200 |
| C | 1.78645300  | -2.10309400 | 0.28441100  |
| O | 1.65213400  | -1.39553300 | -0.76321900 |
| O | 1.04333900  | -1.98895600 | 1.30581900  |
| C | 8.03736300  | 0.97116800  | -0.29770600 |
| O | 7.03282100  | 1.64547600  | -0.38294800 |
| O | 9.27082300  | 1.52250400  | -0.21516600 |
| H | 9.14493200  | 2.48580500  | -0.25045600 |
| O | -1.88510300 | -1.47380400 | -0.95631700 |
| H | -2.45955900 | -2.15790000 | -0.59242200 |
| H | -2.41799200 | -0.65247100 | -1.00836800 |
| C | 2.14453100  | 2.52505400  | 0.49660400  |
| O | 1.26327200  | 1.65294300  | 0.48151400  |
| N | 3.26209800  | 2.51831000  | -0.23472300 |
| H | 2.05059400  | 3.40314000  | 1.15406100  |
| C | 4.20794000  | 3.62746000  | -0.17962700 |
| H | 3.90710200  | 4.33391600  | 0.59734000  |
| H | 5.21072700  | 3.24997400  | 0.03525400  |
| H | 4.23306800  | 4.15389400  | -1.14113600 |
| C | 3.57136200  | 1.42551400  | -1.15938600 |
| H | 2.91952700  | 0.57388500  | -0.96513200 |
| H | 3.43184700  | 1.76252100  | -2.19373000 |
| H | 4.61322900  | 1.13036900  | -1.01835400 |

## M-2

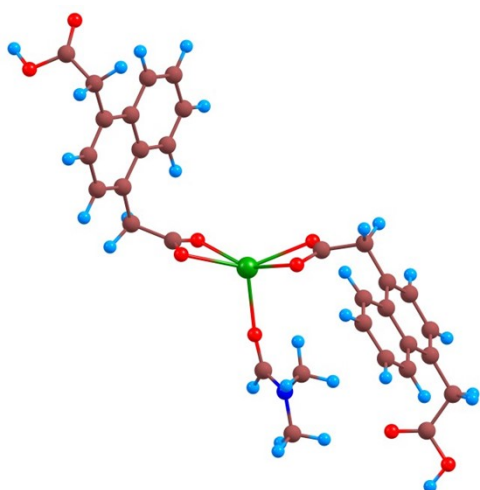

0 1

|    |             |             |             |
|----|-------------|-------------|-------------|
| C  | 5.51724800  | 1.53191300  | 1.53320900  |
| C  | 5.02512400  | 1.51181600  | 0.24618200  |
| C  | 5.47959800  | 0.48949300  | -0.65211200 |
| C  | 6.45428900  | -0.46973000 | -0.20536200 |
| C  | 6.93073100  | -0.41032900 | 1.14527500  |
| C  | 6.45637900  | 0.57773500  | 1.97980000  |
| H  | 5.17431400  | 2.29722500  | 2.22345700  |
| H  | 6.81202800  | 0.62856900  | 3.00539600  |
| C  | 7.92984000  | -1.42529400 | 1.67483500  |
| H  | 7.97194100  | -1.34070800 | 2.76510700  |
| H  | 7.63542200  | -2.44743000 | 1.42609900  |
| C  | 4.02584900  | 2.56208700  | -0.19700200 |
| H  | 3.99277700  | 3.35236800  | 0.55922300  |
| C  | 9.34181200  | -1.23210400 | 1.14663000  |
| O  | 9.92883900  | -1.98683200 | 0.40164500  |
| O  | 9.90173400  | -0.09114700 | 1.61368500  |
| H  | 10.78453600 | -0.04121800 | 1.20958800  |
| C  | 2.59919800  | 2.01760300  | -0.34055000 |
| O  | 2.00252500  | 1.60600800  | 0.70293500  |
| O  | 2.06654100  | 1.99070300  | -1.49749900 |
| H  | 4.32034300  | 3.01385600  | -1.14762600 |
| Ca | 0.12101900  | 0.95043200  | -0.59267500 |
| C  | -4.46951500 | -1.77764500 | -2.04525200 |
| C  | -3.73365300 | -2.13300400 | -0.93304000 |
| C  | -4.36579100 | -2.09581800 | 0.35496400  |
| C  | -5.74938600 | -1.71317800 | 0.45542000  |
| C  | -6.46369900 | -1.33063700 | -0.72536000 |
| C  | -5.81683100 | -1.37312900 | -1.94091400 |
| H  | -3.99977300 | -1.80606000 | -3.02413500 |
| H  | -6.35241100 | -1.09093300 | -2.84393100 |
| C  | -7.90172100 | -0.87864400 | -0.65913400 |
| H  | -8.33406000 | -0.85480700 | -1.66672700 |
| H  | -8.53585700 | -1.56618500 | -0.08857000 |
| C  | -2.27952500 | -2.52628700 | -1.11313600 |
| H  | -2.12886200 | -2.90351400 | -2.12602700 |
| H  | -1.99251500 | -3.31125900 | -0.40828000 |
| C  | -1.34624500 | -1.32384800 | -0.91383800 |
| O  | -1.13179200 | -0.91109200 | 0.27254600  |
| O  | -0.85027200 | -0.76794800 | -1.94004700 |
| C  | -8.09622200 | 0.51543200  | -0.08452000 |
| O  | -7.23327000 | 1.34079100  | 0.12809900  |
| O  | -9.40562600 | 0.76217700  | 0.15186100  |
| H  | -9.45937000 | 1.67368000  | 0.48567300  |
| C  | -2.59729900 | 3.19114100  | -0.19426300 |
| O  | -1.57111600 | 2.51202900  | -0.36994500 |

|   |             |             |             |
|---|-------------|-------------|-------------|
| N | -3.66390600 | 2.82223900  | 0.51492700  |
| H | -2.68504400 | 4.19145600  | -0.64298400 |
| C | -4.80636000 | 3.71606200  | 0.68328100  |
| H | -4.66050800 | 4.62037700  | 0.08856100  |
| H | -5.72132000 | 3.21039600  | 0.36507500  |
| H | -4.90953400 | 4.00107400  | 1.73651600  |
| C | -3.74251000 | 1.52062200  | 1.18132200  |
| H | -2.91615400 | 0.88585200  | 0.86559100  |
| H | -3.69860700 | 1.65654700  | 2.26761000  |
| H | -4.69078100 | 1.04629500  | 0.92001300  |
| C | 4.99280700  | 0.39386200  | -1.98592700 |
| C | 6.90884400  | -1.45660400 | -1.12406800 |
| C | 5.44927100  | -0.58332400 | -2.84305000 |
| C | 6.42014200  | -1.51196900 | -2.41057500 |
| H | 4.23083500  | 1.08760200  | -2.32350300 |
| H | 5.06038300  | -0.63829400 | -3.85577000 |
| H | 6.78411900  | -2.27369100 | -3.09403300 |
| H | 7.66834400  | -2.16582600 | -0.81476000 |
| C | -6.36156900 | -1.71150500 | 1.73989700  |
| C | -3.66526000 | -2.42086200 | 1.55016600  |
| C | -5.65740900 | -2.05601700 | 2.87138600  |
| H | -2.60703800 | -2.64130800 | 1.49470600  |
| C | -4.29255300 | -2.40507400 | 2.77580600  |
| H | -3.73408900 | -2.65660600 | 3.67248300  |
| H | -6.14976000 | -2.05144200 | 3.83956500  |
| H | -7.40639600 | -1.43443600 | 1.83402800  |

### M-3

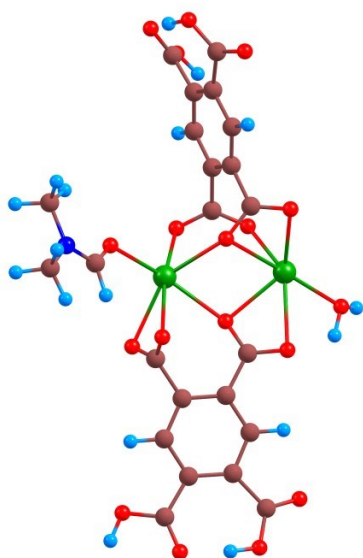

|     |             |            |            |
|-----|-------------|------------|------------|
| 0 1 |             |            |            |
| Ca  | -0.10610400 | 0.87476600 | 0.69728400 |

|    |             |             |             |
|----|-------------|-------------|-------------|
| Ca | -0.04229200 | -2.70970400 | -0.55472400 |
| O  | 2.01982700  | 1.69810000  | 1.61715000  |
| O  | -1.55443000 | -2.39594600 | 1.22309600  |
| O  | -7.91405300 | 0.50297800  | 1.44297900  |
| O  | 1.39318200  | -1.01982300 | 0.40477300  |
| O  | 1.78850600  | 1.72172800  | -0.60991000 |
| O  | -1.61615300 | -0.31241100 | 2.08485700  |
| O  | -7.10935600 | -1.03110500 | 2.80499800  |
| O  | 2.40581100  | -2.47254900 | -0.92667900 |
| O  | 1.13158300  | -4.77410300 | -0.25256200 |
| H  | 1.19602100  | -5.57162400 | 0.28441800  |
| H  | 2.02924800  | -4.41975500 | -0.39091700 |
| C  | -7.04064800 | -0.31799600 | 1.66609000  |
| C  | 2.44282900  | 1.47609600  | 0.44926100  |
| C  | -2.11206900 | -1.28128100 | 1.44950600  |
| C  | 3.73844500  | 0.71080000  | 0.28513200  |
| C  | 3.71797900  | -0.64918000 | -0.07804000 |
| C  | -3.45188700 | -1.04142800 | 0.76896600  |
| C  | -5.84739100 | -0.56478700 | 0.79182600  |
| C  | -4.63445700 | -0.81812200 | 1.46156800  |
| H  | -4.59965500 | -0.79463000 | 2.54715600  |
| C  | 2.43663600  | -1.42213400 | -0.21858900 |
| C  | 4.97114800  | 1.32799100  | 0.46430600  |
| H  | 4.99594600  | 2.36765100  | 0.76448100  |
| O  | 7.08951600  | -2.90085200 | -0.31602700 |
| O  | 8.53907800  | 1.22407800  | 0.00933000  |
| O  | 8.54930100  | -1.26534400 | -0.59541600 |
| O  | 7.21543400  | 2.59716000  | 1.15060900  |
| C  | 7.32481600  | -1.70901500 | -0.34038800 |
| C  | 6.17393700  | -0.71881800 | -0.11807800 |
| C  | 6.18874300  | 0.65279900  | 0.26046800  |
| C  | 7.41996600  | 1.47104200  | 0.44746000  |
| C  | 4.92097000  | -1.32486200 | -0.26903300 |
| H  | 4.90338300  | -2.37411900 | -0.53247700 |
| O  | -8.09195200 | 0.42838700  | -1.13557400 |
| O  | -1.18214800 | -0.50821600 | -1.00807700 |
| O  | -7.00190600 | -0.69623100 | -2.70186600 |
| O  | -1.99394900 | -2.34383100 | -1.97029300 |
| C  | -2.15777700 | -1.28387500 | -1.31797800 |
| C  | -7.05153300 | -0.28108700 | -1.56268600 |
| C  | -5.86751000 | -0.52428900 | -0.62524900 |
| C  | -3.47646200 | -1.01728300 | -0.63845400 |
| C  | -4.67090700 | -0.78850400 | -1.30907900 |
| H  | -4.70811500 | -0.80769800 | -2.39205700 |
| H  | 8.61395100  | -0.28076200 | -0.51383500 |
| H  | 8.06997300  | 3.06026000  | 1.17729600  |
| H  | -6.43471800 | -1.72608600 | 2.80669500  |



|   |             |            |             |
|---|-------------|------------|-------------|
| H | -8.01860700 | 0.66884000 | -0.17908700 |
| C | -0.64245900 | 3.83833200 | -0.46079100 |
| O | -1.17661000 | 2.94378200 | 0.22369700  |
| N | -1.24310000 | 4.98591400 | -0.80075500 |
| H | 0.38527000  | 3.72051600 | -0.83205400 |
| C | -0.55669800 | 5.98719700 | -1.60537900 |
| H | 0.44829800  | 5.63892000 | -1.85037700 |
| H | -1.10341300 | 6.16934500 | -2.53687900 |
| H | -0.47921000 | 6.93184700 | -1.05613600 |
| C | -2.60949000 | 5.27766400 | -0.38057500 |
| H | -2.98033800 | 4.43937400 | 0.20653700  |
| H | -2.62965800 | 6.18911500 | 0.22618600  |
| H | -3.24927600 | 5.42419700 | -1.25710900 |

#### M-4

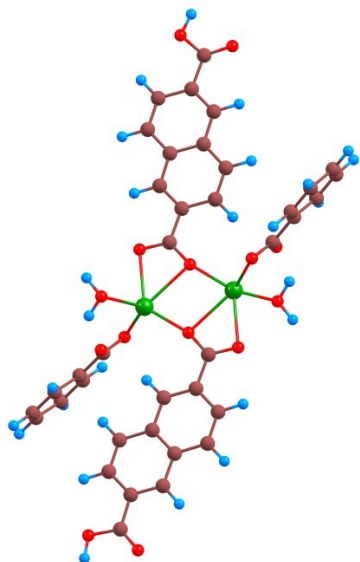

|     |             |             |             |
|-----|-------------|-------------|-------------|
| 0 1 |             |             |             |
| Ca  | 0.83854800  | 1.99997800  | 0.65863900  |
| Ca  | -0.84968800 | -1.25816300 | -0.40848600 |
| O   | -1.36838500 | 0.94798800  | 0.09666400  |
| O   | 1.36838600  | -0.21893700 | 0.18619000  |
| O   | -1.34855800 | 3.02526700  | 0.86917100  |
| O   | 1.33411400  | -2.25901300 | -0.67936700 |
| C   | -1.98888700 | 2.03284800  | 0.43762200  |
| C   | 4.23409400  | -0.29171800 | 0.43437400  |
| C   | 3.46731800  | -1.38018200 | -0.06606600 |
| C   | -3.47591500 | 2.10276300  | 0.31600100  |
| C   | -5.62549700 | 1.08510600  | -0.20205900 |
| C   | -4.21365500 | 1.01148500  | -0.10289600 |

|   |              |             |             |
|---|--------------|-------------|-------------|
| H | -3.72811200  | 0.07682000  | -0.36316700 |
| C | 1.98052400   | -1.29183800 | -0.19961700 |
| C | 5.59961400   | -0.40160900 | 0.54134300  |
| H | 6.18483000   | 0.43267600  | 0.91737000  |
| C | 5.50058000   | -2.69633300 | -0.33704700 |
| C | 6.27172100   | -1.59620200 | 0.16370300  |
| C | 4.09621200   | -2.55409700 | -0.44119600 |
| H | 3.49455700   | -3.37413200 | -0.81877600 |
| C | -6.28421300  | 2.31429400  | 0.12753600  |
| C | -4.13309300  | 3.32134100  | 0.64642300  |
| C | -5.49838100  | 3.42290900  | 0.55072700  |
| H | -5.99944600  | 4.35437900  | 0.79905400  |
| H | 3.74700500   | 0.63092000  | 0.72925600  |
| H | -3.52715100  | 4.15954600  | 0.96993200  |
| C | 7.67640600   | -1.73730500 | 0.26569100  |
| C | 6.17068800   | -3.89350900 | -0.71360100 |
| C | 8.30038300   | -2.91269900 | -0.10821900 |
| C | -6.40376700  | -0.03053500 | -0.61713100 |
| C | -7.69358600  | 2.38103500  | 0.02243000  |
| C | -7.77148300  | 0.06112500  | -0.70827000 |
| C | 7.53515900   | -4.00455500 | -0.60424000 |
| H | 8.28174200   | -0.91836200 | 0.64117700  |
| H | 8.04153600   | -4.91810800 | -0.89195000 |
| H | 5.58174000   | -4.72460900 | -1.09135900 |
| C | 9.77988500   | -2.98599500 | 0.02840100  |
| O | 10.48759100  | -2.09125300 | 0.44679200  |
| O | 10.28910700  | -4.18013800 | -0.36832400 |
| H | 11.24919300  | -4.11328400 | -0.23601100 |
| C | -8.42637700  | 1.28207000  | -0.38703200 |
| H | -5.89203700  | -0.95914500 | -0.85277100 |
| H | -8.36363400  | -0.79032400 | -1.02152700 |
| H | -8.21752800  | 3.30032700  | 0.26437200  |
| C | -9.90420800  | 1.42913700  | -0.47266600 |
| O | -10.52184100 | 2.44191800  | -0.20872800 |
| O | -10.52632600 | 0.29550500  | -0.88590300 |
| H | -11.47409000 | 0.50806800  | -0.90261400 |
| C | 4.21435000   | 4.44764700  | -0.24533700 |
| C | 5.30898200   | 4.53116600  | 0.62482200  |
| C | 6.39235500   | 5.34886300  | 0.30968700  |
| C | 6.38699300   | 6.08842000  | -0.87569400 |
| C | 5.29676100   | 6.00875000  | -1.74596100 |
| C | 4.21320900   | 5.19071200  | -1.43294300 |
| H | 5.29288100   | 3.94832700  | 1.53921300  |
| H | 7.24061200   | 5.41063600  | 0.98527100  |
| H | 7.23179700   | 6.72586200  | -1.12109200 |
| H | 5.29344100   | 6.58414700  | -2.66713700 |
| H | 3.35655700   | 5.11267500  | -2.09312700 |

|   |             |             |             |
|---|-------------|-------------|-------------|
| C | 3.04848400  | 3.57004400  | 0.08913600  |
| O | 3.06015400  | 2.91637000  | 1.19380300  |
| O | 2.07987200  | 3.48425700  | -0.72786800 |
| C | -4.09918400 | -3.92007700 | 0.37381000  |
| C | -4.08642800 | -4.66752000 | 1.55856500  |
| C | -5.09918900 | -5.58973300 | 1.81385100  |
| C | -6.12716100 | -5.77471800 | 0.88578100  |
| C | -6.14106400 | -5.03592400 | -0.29986900 |
| C | -5.13048200 | -4.11091300 | -0.55520400 |
| H | -3.27723800 | -4.50983100 | 2.26286500  |
| H | -5.08841800 | -6.16541100 | 2.73474700  |
| H | -6.91579500 | -6.49461000 | 1.08566700  |
| H | -6.93841900 | -5.18240600 | -1.02271600 |
| H | -5.12094400 | -3.53086500 | -1.47164700 |
| C | -3.00906100 | -2.92930600 | 0.10340900  |
| O | -3.07020800 | -2.21236400 | -0.96000800 |
| O | -2.05197800 | -2.81867200 | 0.92992900  |
| O | -1.21107600 | -1.59518600 | -2.80365600 |
| H | -0.69699200 | -2.19439100 | -3.35832700 |
| O | 1.18312300  | 2.39529600  | 3.04754900  |
| H | 0.68153000  | 3.01903900  | 3.58632700  |
| H | 2.05285800  | 2.80005600  | 2.85723200  |
| H | -2.07200100 | -2.02228200 | -2.62287000 |

## Epoxide (E)

O 1

|   |             |             |             |
|---|-------------|-------------|-------------|
| C | 2.58788900  | 0.02112100  | 0.74351800  |
| C | 1.60256000  | 0.57915500  | -0.20624400 |
| O | 2.48862900  | -0.48157100 | -0.59149700 |
| H | 3.49821600  | 0.57634400  | 0.97096200  |
| H | 2.23870800  | -0.65267700 | 1.52551400  |
| H | 1.84077600  | 1.54428700  | -0.65732500 |
| C | 0.14660500  | 0.26436300  | -0.11790400 |
| C | -0.78852700 | 1.30438300  | -0.05885100 |
| C | -0.30153300 | -1.06176900 | -0.07974200 |
| C | -2.15031900 | 1.02489100  | 0.05541400  |
| H | -0.44882600 | 2.33649000  | -0.10213200 |
| C | -1.66302300 | -1.34004500 | 0.03040800  |
| H | 0.42617900  | -1.86313500 | -0.15887400 |
| C | -2.59105400 | -0.29867200 | 0.10209200  |
| H | -2.86659500 | 1.84009300  | 0.10189400  |
| H | -2.00157700 | -2.37196300 | 0.05374400  |
| H | -3.65151000 | -0.51743300 | 0.18605300  |

EM-1

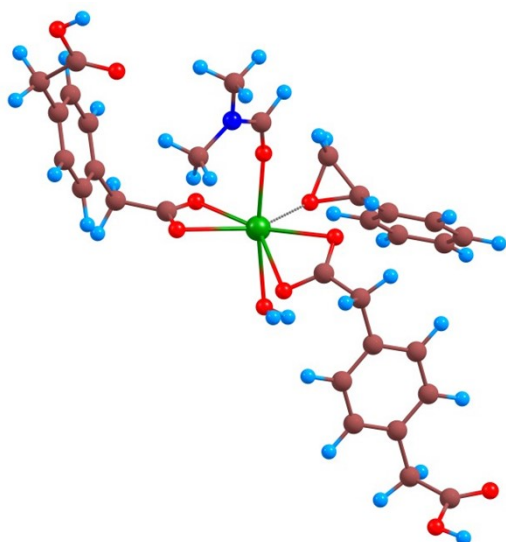

| O 1 |             |             |             |
|-----|-------------|-------------|-------------|
| C   | 3.92762500  | -2.88765300 | -0.10696200 |
| C   | 3.89992200  | -2.04872700 | 1.01600100  |
| C   | 5.07836900  | -1.37970800 | 1.37086500  |
| C   | 6.24897600  | -1.53969000 | 0.63062700  |
| C   | 6.27184800  | -2.37645100 | -0.49124000 |
| C   | 5.09794800  | -3.04972900 | -0.84722500 |
| H   | 3.02021000  | -3.40429100 | -0.40275900 |
| H   | 5.08042000  | -0.72720300 | 2.24018900  |
| H   | 7.15620200  | -1.02222500 | 0.92948900  |
| H   | 5.09840600  | -3.70928300 | -1.71136000 |
| C   | 7.54947300  | -2.54932700 | -1.30006100 |
| H   | 7.35899600  | -3.16997500 | -2.17846500 |
| H   | 7.92585400  | -1.57686400 | -1.63130500 |
| C   | 2.62593000  | -1.85617000 | 1.81499900  |
| H   | 2.18563900  | -2.83229700 | 2.04924700  |
| C   | 8.64454900  | -3.17997100 | -0.46064300 |
| O   | 9.40398100  | -2.57711600 | 0.26619000  |
| O   | 8.66465300  | -4.52880800 | -0.58091100 |
| H   | 9.35987300  | -4.84199300 | 0.02273600  |
| C   | 1.57258800  | -1.05799500 | 1.03346100  |
| O   | 1.06147300  | -1.60247400 | -0.00010200 |
| O   | 1.26166500  | 0.10079800  | 1.42685700  |
| H   | 2.83731400  | -1.33739600 | 2.75225600  |
| Ca  | -0.30749000 | 0.48994400  | -0.46661200 |
| C   | -5.90202700 | 0.87645600  | -1.97990600 |
| C   | -4.92521500 | -0.01268900 | -2.44433000 |
| C   | -5.11949300 | -1.38311900 | -2.22039900 |
| C   | -6.24890500 | -1.84374900 | -1.54786800 |
| C   | -7.21746000 | -0.95113500 | -1.07227000 |
| C   | -7.03121300 | 0.41512100  | -1.30347700 |
| H   | -5.77649500 | 1.94254600  | -2.15039100 |

|   |             |             |             |
|---|-------------|-------------|-------------|
| H | -4.36764100 | -2.08602800 | -2.56368800 |
| H | -6.37928400 | -2.91182000 | -1.38910300 |
| H | -7.77519900 | 1.12719200  | -0.95352600 |
| C | -8.42813800 | -1.44749400 | -0.32096500 |
| H | -9.29895200 | -0.80344400 | -0.48679600 |
| H | -8.73032300 | -2.44469200 | -0.66533800 |
| C | -3.67971700 | 0.49617500  | -3.13305600 |
| H | -3.82698200 | 1.51023800  | -3.50980000 |
| H | -3.43218900 | -0.15131700 | -3.98277900 |
| C | -2.45388000 | 0.49530500  | -2.20057500 |
| O | -2.13135500 | -0.60326900 | -1.64460500 |
| O | -1.82164100 | 1.57649400  | -2.03136600 |
| C | -8.23142800 | -1.55454900 | 1.18249800  |
| O | -7.19196200 | -1.43005700 | 1.79451900  |
| O | -9.40276300 | -1.83388400 | 1.80279800  |
| H | -9.19949900 | -1.90913100 | 2.75042400  |
| O | 1.51467500  | 0.01717900  | -2.09157700 |
| H | 2.34278400  | 0.50619900  | -2.16440300 |
| H | 1.70938800  | -0.79285000 | -1.57410100 |
| C | -2.63717500 | 0.78365900  | 2.24765500  |
| O | -1.81624800 | 0.96565400  | 1.33687100  |
| N | -3.50971300 | -0.22530400 | 2.34074900  |
| H | -2.70507700 | 1.49515500  | 3.08602900  |
| C | -4.38025800 | -0.36117200 | 3.50315100  |
| H | -4.27468900 | 0.51218800  | 4.15098800  |
| H | -5.42014700 | -0.45503800 | 3.18042900  |
| H | -4.11232100 | -1.25617500 | 4.07742600  |
| C | -3.59998800 | -1.27207800 | 1.32087700  |
| H | -3.11166700 | -0.95020500 | 0.40100300  |
| H | -3.12413100 | -2.19173000 | 1.68254200  |
| H | -4.65463500 | -1.47046200 | 1.11798800  |
| C | 0.22800300  | 3.67077400  | 0.82457100  |
| C | 1.60799600  | 3.14942800  | 0.88778000  |
| O | 0.71224400  | 2.77404800  | -0.19717900 |
| H | -0.54194600 | 3.24407100  | 1.46348200  |
| H | 0.06370400  | 4.68940000  | 0.47944800  |
| H | 1.79780900  | 2.32505800  | 1.57203400  |
| C | 2.78891000  | 3.97679500  | 0.51083800  |
| C | 3.89992400  | 4.00998700  | 1.36199100  |
| C | 2.80615100  | 4.73334300  | -0.66862100 |
| C | 5.00513000  | 4.80214200  | 1.05035000  |
| H | 3.89758400  | 3.41353700  | 2.27069900  |
| C | 3.91419400  | 5.51873400  | -0.98187000 |
| H | 1.95666300  | 4.68435700  | -1.34292600 |
| C | 5.01435400  | 5.55912100  | -0.12190800 |
| H | 5.86069500  | 4.82140600  | 1.71898100  |
| H | 3.92103600  | 6.09748100  | -1.90096100 |

H 5.87667000 6.17151400 -0.36836200

## EM-2

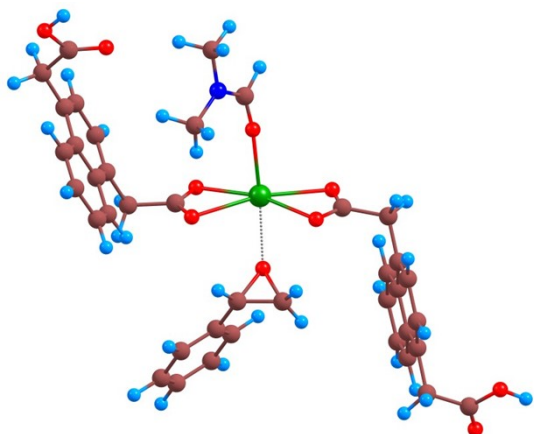

O 1

|    |              |             |             |
|----|--------------|-------------|-------------|
| C  | -4.73426900  | -2.91074600 | 1.16299700  |
| C  | -4.43053300  | -2.46791400 | -0.10646200 |
| C  | -5.17266900  | -1.36450000 | -0.64699900 |
| C  | -6.22200200  | -0.75962100 | 0.13012600  |
| C  | -6.49631500  | -1.25542200 | 1.44714600  |
| C  | -5.75423500  | -2.31001300 | 1.93215000  |
| H  | -4.17493100  | -3.74030200 | 1.58569600  |
| H  | -5.95550600  | -2.69158500 | 2.92959300  |
| C  | -7.57201600  | -0.62901400 | 2.31855800  |
| H  | -7.45690200  | -1.00140900 | 3.34106800  |
| H  | -7.48704900  | 0.45990400  | 2.34356100  |
| C  | -3.32849600  | -3.13719300 | -0.90089400 |
| H  | -3.03668200  | -4.05794900 | -0.38612000 |
| C  | -8.98896700  | -0.94965700 | 1.87105600  |
| O  | -9.78093600  | -0.15741100 | 1.40822900  |
| O  | -9.28908800  | -2.25705900 | 2.05207700  |
| H  | -10.19564500 | -2.37319900 | 1.72060800  |
| C  | -2.06479900  | -2.27027600 | -1.02928500 |
| O  | -1.45486900  | -1.94243800 | 0.03642200  |
| O  | -1.69110900  | -1.91012300 | -2.18849900 |
| H  | -3.66739200  | -3.40521500 | -1.90486700 |
| Ca | 0.11654400   | -0.62840300 | -1.24269900 |
| C  | 5.35427200   | 1.49305500  | -1.54578700 |
| C  | 4.50062800   | 1.72514300  | -0.48633900 |
| C  | 4.92353200   | 1.35262800  | 0.83401300  |
| C  | 6.23131100   | 0.78495200  | 1.02720800  |
| C  | 7.07514200   | 0.55246200  | -0.10636900 |
| C  | 6.62294300   | 0.90445700  | -1.35878000 |

|   |             |             |             |
|---|-------------|-------------|-------------|
| H | 5.04363600  | 1.77260600  | -2.54832000 |
| H | 7.25706100  | 0.73505300  | -2.22542700 |
| C | 8.44537200  | -0.06020600 | 0.05738200  |
| H | 8.99624900  | 0.00986500  | -0.88877200 |
| H | 9.05555500  | 0.46910800  | 0.79630400  |
| C | 3.15119500  | 2.36213300  | -0.75774300 |
| H | 3.20460300  | 2.93546000  | -1.68487600 |
| H | 2.87361800  | 3.04559400  | 0.04987600  |
| C | 2.03351100  | 1.31791100  | -0.91715800 |
| O | 1.58054400  | 0.75211300  | 0.13304400  |
| O | 1.62362200  | 1.05325100  | -2.08374100 |
| C | 8.43283700  | -1.53583200 | 0.42326800  |
| O | 7.54419700  | -2.32967800 | 0.19995100  |
| O | 9.59040200  | -1.89964100 | 1.02453800  |
| H | 9.52473600  | -2.85580400 | 1.18936900  |
| C | 2.71946800  | -3.05712700 | -1.52430100 |
| O | 1.75962200  | -2.27505500 | -1.49186400 |
| N | 3.69617300  | -3.13114100 | -0.61457700 |
| H | 2.83129500  | -3.77435200 | -2.35189900 |
| C | 4.75797200  | -4.12587900 | -0.72198800 |
| H | 4.65614800  | -4.67438000 | -1.66113100 |
| H | 5.73374800  | -3.63514000 | -0.68799100 |
| H | 4.69578700  | -4.83949100 | 0.10809200  |
| C | 3.72474600  | -2.24996800 | 0.55263300  |
| H | 3.03540700  | -1.41929000 | 0.40729900  |
| H | 3.43786900  | -2.80614100 | 1.45277900  |
| H | 4.73859700  | -1.86473100 | 0.68102800  |
| C | -4.89597000 | -0.84096100 | -1.94142900 |
| C | -6.94959300 | 0.32474400  | -0.43601600 |
| C | -5.61667600 | 0.21672200  | -2.45197700 |
| C | -6.65490700 | 0.80139700  | -1.69471500 |
| H | -4.08607900 | -1.26666800 | -2.52333100 |
| H | -5.38591200 | 0.59963900  | -3.44190600 |
| H | -7.22701900 | 1.62798000  | -2.10616100 |
| H | -7.76573700 | 0.77036400  | 0.12151600  |
| C | 6.64112800  | 0.45666800  | 2.34973600  |
| C | 4.08601600  | 1.52381400  | 1.97129900  |
| C | 5.81100200  | 0.65926800  | 3.42911700  |
| H | 3.07348500  | 1.87737700  | 1.82513700  |
| C | 4.51667100  | 1.18903900  | 3.23569800  |
| H | 3.85601500  | 1.32619900  | 4.08666100  |
| H | 6.14866800  | 0.40285400  | 4.42914700  |
| H | 7.62858000  | 0.03810900  | 2.51567000  |
| C | -2.50983600 | 1.10614400  | 0.26741800  |
| C | -1.41184500 | 2.09099600  | 0.33418400  |
| O | -1.53843800 | 1.19285900  | -0.80388800 |
| H | -2.45868300 | 0.18094800  | 0.83605000  |

|   |             |            |             |
|---|-------------|------------|-------------|
| H | -3.50337100 | 1.44664500 | -0.01388400 |
| H | -0.55461000 | 1.85056300 | 0.96074600  |
| C | -1.62000100 | 3.54213200 | 0.06673700  |
| C | -1.07799000 | 4.48452200 | 0.94839200  |
| C | -2.36230900 | 3.98299400 | -1.03653000 |
| C | -1.28870700 | 5.84814800 | 0.74248300  |
| H | -0.49109600 | 4.14832500 | 1.79951800  |
| C | -2.56575200 | 5.34573100 | -1.24478200 |
| H | -2.76002900 | 3.25347400 | -1.73491300 |
| C | -2.03376900 | 6.28177200 | -0.35458800 |
| H | -0.86532100 | 6.57013400 | 1.43460100  |
| H | -3.13749300 | 5.67876900 | -2.10607700 |
| H | -2.19384900 | 7.34317200 | -0.51956300 |

### EM-3

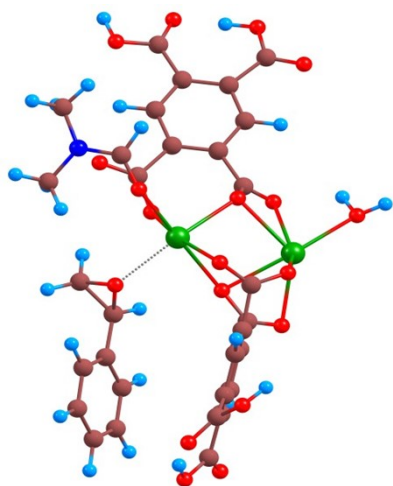

|     |             |             |             |
|-----|-------------|-------------|-------------|
| 0 1 |             |             |             |
| Ca  | 0.13220600  | 0.53128200  | 0.79188800  |
| Ca  | 0.21995700  | -3.12675300 | 0.01386800  |
| O   | 3.16407400  | 2.76075900  | -0.43052700 |
| O   | -1.27918100 | -2.69547100 | 1.76724600  |
| O   | -7.64278900 | 0.24896300  | 1.78129600  |
| O   | 1.73332900  | -1.28982200 | 0.73796900  |
| O   | 1.69570000  | 1.09678600  | -0.82319400 |
| O   | -1.34630500 | -0.51933700 | 2.34980100  |
| O   | -6.82704600 | -1.12825600 | 3.29537000  |
| O   | 2.41511800  | -2.64268500 | -0.88492900 |
| O   | 1.65470000  | -5.03080000 | 0.22519900  |
| H   | 1.91577000  | -5.80784900 | 0.73165800  |
| H   | 2.45417700  | -4.63815500 | -0.16810200 |
| C   | -6.77314100 | -0.55207000 | 2.08029300  |
| C   | 2.86203900  | 1.56495900  | -0.59168800 |
| C   | -1.84955100 | -1.56634500 | 1.86797900  |
| C   | 4.00703000  | 0.54649500  | -0.50504500 |



|   |             |             |             |
|---|-------------|-------------|-------------|
| C | 3.86709300  | -0.84439100 | -0.34711300 |
| C | -3.21302500 | -1.42678600 | 1.20529800  |
| C | -5.60232800 | -0.91682600 | 1.21816600  |
| C | -4.37914100 | -1.11114400 | 1.89009300  |
| H | -4.32157200 | -0.95882200 | 2.96423100  |
| C | 2.57730400  | -1.60826600 | -0.16998400 |
| C | 5.30155300  | 1.05456900  | -0.62686700 |
| H | 5.38689600  | 2.12680000  | -0.74124200 |
| O | 7.03563700  | -3.35540800 | 0.06930400  |
| O | 8.82537000  | 0.47675900  | -1.11229800 |
| O | 8.61309200  | -2.04355200 | -0.74969200 |
| O | 7.65962300  | 2.30157700  | -0.61813000 |
| C | 7.36771500  | -2.26422900 | -0.35280100 |
| C | 6.31497700  | -1.15133300 | -0.45600700 |
| C | 6.45554100  | 0.25708700  | -0.61552200 |
| C | 7.74561600  | 0.97299300  | -0.80079100 |
| C | 5.01480300  | -1.64419800 | -0.33034600 |
| H | 4.91520600  | -2.71347100 | -0.20203000 |
| O | -7.84747800 | -0.06040700 | -0.77415700 |
| O | -0.99880100 | -1.08205900 | -0.68324400 |
| O | -6.82136000 | -1.37359500 | -2.23199400 |
| O | -1.79548900 | -3.04109700 | -1.37941700 |
| C | -1.96662600 | -1.91068800 | -0.86526100 |
| C | -6.83944700 | -0.84829200 | -1.13754800 |
| C | -5.65149500 | -1.03645400 | -0.19380700 |
| C | -3.27109200 | -1.57205100 | -0.19339600 |
| C | -4.47566400 | -1.40630400 | -0.86311900 |
| H | -4.53455600 | -1.54349100 | -1.93584300 |
| H | 8.75976800  | -1.09933100 | -1.01744400 |
| H | 8.54468900  | 2.65652000  | -0.80753800 |
| H | -6.15877100 | -1.82601400 | 3.36386700  |
| H | -7.75406100 | 0.26596000  | 0.15547500  |
| C | -0.78710700 | 3.16233400  | -1.29550100 |
| C | -1.69582400 | 2.06245500  | -1.66578700 |
| O | -1.26610500 | 2.24340000  | -0.27876800 |
| H | 0.27717700  | 3.06882700  | -1.50029500 |
| H | -1.19597300 | 4.16611900  | -1.20170700 |
| H | -1.23817500 | 1.19384700  | -2.13548000 |
| C | -3.15161600 | 2.23304900  | -1.92816800 |
| C | -3.73649900 | 1.55008900  | -3.00152300 |
| C | -3.95325900 | 3.04119500  | -1.11108000 |
| C | -5.10281500 | 1.67224400  | -3.25769400 |
| H | -3.12171700 | 0.91369700  | -3.63325300 |
| C | -5.31794200 | 3.16094200  | -1.36691500 |
| H | -3.50964900 | 3.54822000  | -0.25972800 |
| C | -5.89698300 | 2.47580300  | -2.43829200 |
| H | -5.55094100 | 1.12276100  | -4.07911900 |

|   |             |            |             |
|---|-------------|------------|-------------|
| H | -5.93416000 | 3.78016200 | -0.72168900 |
| H | -6.96364500 | 2.55194800 | -2.62269000 |
| C | 2.11028200  | 2.59640800 | 2.67403600  |
| O | 1.06418200  | 1.99575100 | 2.36961600  |
| N | 2.38686200  | 3.86383500 | 2.36446400  |
| H | 2.89344900  | 2.09875800 | 3.26498000  |
| C | 3.73368000  | 4.39303400 | 2.54041300  |
| H | 4.24183900  | 4.43034600 | 1.57139100  |
| H | 3.68934500  | 5.39696900 | 2.97262600  |
| H | 4.30046800  | 3.74600800 | 3.21336800  |
| C | 1.48460200  | 4.62621200 | 1.50420200  |
| H | 1.79524700  | 4.49621600 | 0.46281700  |
| H | 0.47014200  | 4.25118100 | 1.63614100  |
| H | 1.52552000  | 5.68039000 | 1.79029300  |

#### EM-4

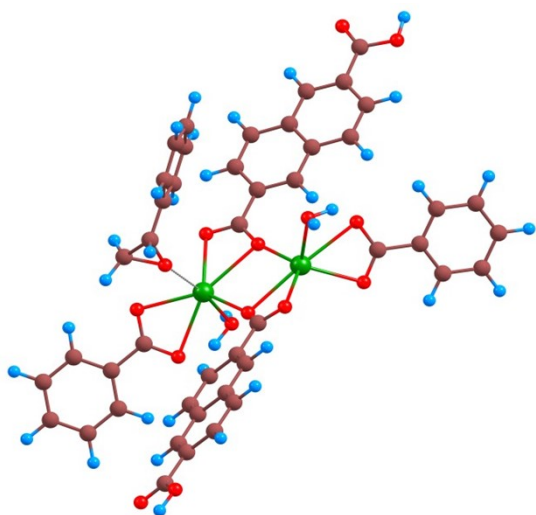

|     |             |             |             |
|-----|-------------|-------------|-------------|
| O 1 |             |             |             |
| Ca  | 0.90692300  | -1.59400600 | -0.89384800 |
| Ca  | -0.90026200 | 1.69703700  | -0.04288700 |
| O   | -1.38013500 | -0.53215900 | -0.42052100 |
| O   | 1.34358900  | 0.70369300  | -0.50577000 |
| O   | -1.25438100 | -2.73327000 | -0.65555600 |
| O   | 1.24484400  | 2.60055200  | 0.64116000  |
| C   | -1.93909300 | -1.69127500 | -0.48106300 |
| C   | 4.20521500  | 0.81267700  | -0.59948900 |
| C   | 3.41750500  | 1.75049500  | 0.12413700  |
| C   | -3.42538600 | -1.79956600 | -0.33594500 |
| C   | -5.62521800 | -0.78258200 | -0.10879100 |
| C   | -4.21832000 | -0.67183400 | -0.24142400 |
| H   | -3.77959600 | 0.32017200  | -0.26863400 |
| C   | 1.92141800  | 1.69118700  | 0.09072900  |

|   |              |             |             |
|---|--------------|-------------|-------------|
| C | 5.57716800   | 0.87921800  | -0.54549300 |
| H | 6.17894700   | 0.16458800  | -1.10007900 |
| C | 5.44100500   | 2.82818900  | 0.94883400  |
| C | 6.23414600   | 1.87664100  | 0.22631900  |
| C | 4.03010900   | 2.73804200  | 0.87371800  |
| H | 3.41123700   | 3.45082300  | 1.40875300  |
| C | -6.22182200  | -2.08476000 | -0.06566200 |
| C | -4.02125500  | -3.09202100 | -0.30246100 |
| C | -5.38069200  | -3.22875500 | -0.16561400 |
| H | -5.83471400  | -4.21554600 | -0.13756700 |
| H | 3.72308000   | 0.05311100  | -1.20558900 |
| H | -3.37389300  | -3.95708400 | -0.38987300 |
| C | 7.64478100   | 1.96554300  | 0.30313100  |
| C | 6.09692800   | 3.83036100  | 1.71670100  |
| C | 8.25454100   | 2.94977900  | 1.05856800  |
| C | -6.45839000  | 0.36639100  | -0.01773700 |
| C | -7.62629100  | -2.18625400 | 0.07195900  |
| C | -7.82009900  | 0.23921100  | 0.11343500  |
| C | 7.46757600   | 3.89477500  | 1.77385800  |
| H | 8.26629800   | 1.25663700  | -0.23481600 |
| H | 7.96247400   | 4.66045100  | 2.35922800  |
| H | 5.49161800   | 4.55043700  | 2.26036800  |
| C | 9.74090400   | 2.97860200  | 1.09060300  |
| O | 10.46822900  | 2.20070800  | 0.50512100  |
| O | 10.23459700  | 3.98432400  | 1.85800600  |
| H | 11.20123100  | 3.90535200  | 1.80270700  |
| C | -8.41348400  | -1.05258800 | 0.16074800  |
| H | -5.99153300  | 1.34634900  | -0.05809300 |
| H | -8.45419900  | 1.11513100  | 0.18072100  |
| H | -8.10386700  | -3.16036000 | 0.10810400  |
| C | -9.88189000  | -1.23987300 | 0.30406000  |
| O | -10.44817500 | -2.31424100 | 0.35253500  |
| O | -10.56108200 | -0.06667100 | 0.37976700  |
| H | -11.49698200 | -0.31145700 | 0.46836500  |
| C | 4.35255700   | -3.83256600 | -2.27527100 |
| C | 5.28295800   | -3.26628300 | -3.15629100 |
| C | 6.40964300   | -3.98897700 | -3.54457700 |
| C | 6.61281600   | -5.28191500 | -3.05576600 |
| C | 5.68682200   | -5.85149300 | -2.17794300 |
| C | 4.56050400   | -5.12946000 | -1.78834200 |
| H | 5.10489300   | -2.26170800 | -3.52415600 |
| H | 7.12940200   | -3.54658300 | -4.22728600 |
| H | 7.49111600   | -5.84499100 | -3.35879700 |
| H | 5.84434900   | -6.85746300 | -1.79956400 |
| H | 3.82756000   | -5.55227800 | -1.10997000 |
| C | 3.14104800   | -3.05494900 | -1.85270500 |
| O | 2.97229800   | -1.87461000 | -2.32594900 |

|   |             |             |             |
|---|-------------|-------------|-------------|
| O | 2.32104300  | -3.57510700 | -1.03879500 |
| C | -3.95294300 | 4.33270700  | -1.50990900 |
| C | -3.70028300 | 5.04894600  | -2.68705700 |
| C | -4.64517400 | 5.95015600  | -3.17337900 |
| C | -5.84490800 | 6.14568800  | -2.48445500 |
| C | -6.09889400 | 5.43815400  | -1.30688500 |
| C | -5.15636300 | 4.53365200  | -0.82147100 |
| H | -2.76115900 | 4.88342100  | -3.20318800 |
| H | -4.44775300 | 6.50132800  | -4.08819500 |
| H | -6.58049400 | 6.84927300  | -2.86408900 |
| H | -7.03029700 | 5.59256400  | -0.76976700 |
| H | -5.33277400 | 3.97832100  | 0.09334300  |
| C | -2.93421700 | 3.36368900  | -0.99126000 |
| O | -3.21322800 | 2.66641200  | 0.04961200  |
| O | -1.82207900 | 3.25520800  | -1.59238600 |
| O | -1.66050400 | 2.32133800  | 2.20333300  |
| H | -1.22889000 | 3.01920700  | 2.71102400  |
| O | 0.52397900  | -1.48724900 | -3.33048100 |
| H | 0.05719700  | -2.17561000 | -3.81958300 |
| H | 1.48543100  | -1.65143200 | -3.44251700 |
| H | -2.47941700 | 2.69478700  | 1.81756200  |
| C | 2.01998900  | -3.22842200 | 2.02384400  |
| C | 1.49090000  | -2.15597100 | 2.89006200  |
| O | 1.53375700  | -1.99940400 | 1.44731300  |
| H | 3.09231100  | -3.37752000 | 1.92915000  |
| H | 1.40125900  | -4.09798100 | 1.81771900  |
| H | 2.22375400  | -1.52892600 | 3.39652700  |
| C | 0.15273500  | -2.21091700 | 3.54202600  |
| C | 0.02170900  | -1.75922400 | 4.86047300  |
| C | -0.97071500 | -2.71627200 | 2.87281000  |
| C | -1.21147100 | -1.82343300 | 5.50963700  |
| H | 0.88770600  | -1.35728100 | 5.38062200  |
| C | -2.20410400 | -2.76844900 | 3.51995300  |
| H | -0.88796400 | -3.04862400 | 1.84254200  |
| C | -2.32695200 | -2.32678100 | 4.83978800  |
| H | -1.30099500 | -1.47286200 | 6.53346800  |
| H | -3.07105700 | -3.14880200 | 2.98835100  |
| H | -3.28958000 | -2.36916400 | 5.34038300  |

## References:

- 1 G. M. Sheldrick, *Acta Crystallogr., Sect. A: Found. Adv.*, 2015, **71**, 3-8.
- 2 A. L. Spek, *J. Appl. Crystallogr.*, 2003, **36**, 7.
- 3 M. G. Sheldrick, A Short History of SHELX. *Acta Cryst.*, 2008, **A64**, 112-122.
- 4 O. V. Dolomanov, L. J. Bourhis, R. J. Gildea, J. A. K. Howard and H. Puschmann, *J. Appl. Crystallogr.*, 2009, **42**, 339342.
- 5 J. L. Farrugia, *J. Appl. Crystallogr.* 2012, **45**, 849-854.
- 6 A. V. Blatov, Nanocluster Analysis of Intermetallic Structures with the Program Package TOPOS. *Struct. Chem.* 2012, **23**, 955-963.
- 7 R. Bader, *J. Phys. Chem. A*, 1998, **102**, 7314-7323.
- 8 P. S. V. Kumar, V. Raghavendra and V. Subhramanian, *Journal of Chemical Sciences*, 2016, **128**, 1527-1536.
- 9 A. Banerjee, T. Ash, T. Debnath and A. K. Das, *Int. J. Hydrog. Energy*. 2021, **46**, 17827-17839.
